# Supplementary material for: Luminescent organic dyes containing a phenanthro[9,10-D]imidazole core and [Ir(N^C)(N^N)]+ complexes based on the cyclometalating and diimine ligands of this type
Source: Royal Society of Chemistry journal article supplement (doi:10.1039/d0dt00568a), 2020-01-01
Supplement: d0dt00568a1.pdf [file d0dt00568a1.pdf]

## Electronic Supplementary Information

for the article

### Luminescent Organic Dyes Containing Phenanthro[9,10-D]Imidazole Core and $[\text{Ir}(\text{N}^{\wedge}\text{C})(\text{N}^{\wedge}\text{N})]^+$ Complexes Based on the Cyclometalating and Diimine Ligands of This Type

Anastasia I. Solomatina<sup>1</sup>, Kirill M. Kuznetsov<sup>1</sup>, Vladislav V. Gurzhiy<sup>2</sup>, Vladimir V. Pavlovskiy<sup>1</sup>,  
Vitaly V. Porsev<sup>1</sup>, Robert A. Evarestov<sup>1</sup> and Sergey P. Tunik<sup>1\*</sup>.

<sup>1</sup>St. Petersburg State University, Institute of Chemistry, Universitetskii pr. 26, 198504 St.  
Petersburg, Russia.

<sup>2</sup>St. Petersburg State University, Institute of Earth Sciences, University emb. 7/9, 199034 Saint  
Petersburg, Russia

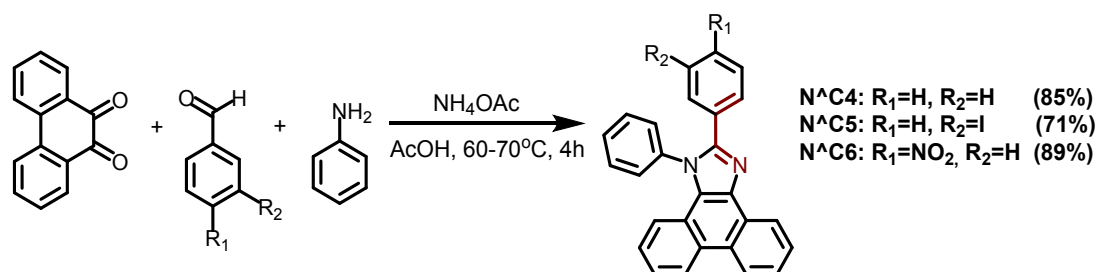

*Scheme S1. Synthesis of  $\text{N}^{\wedge}\text{C4}$ -  $\text{N}^{\wedge}\text{C6}$  ligands.*

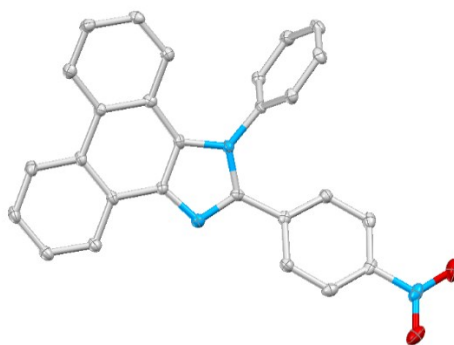

*Figure S1. Perspective views of  $\text{N}^{\wedge}\text{C6}$  showing thermal ellipsoids at the 40% probability level. Hydrogen atoms are omitted for clarity.*

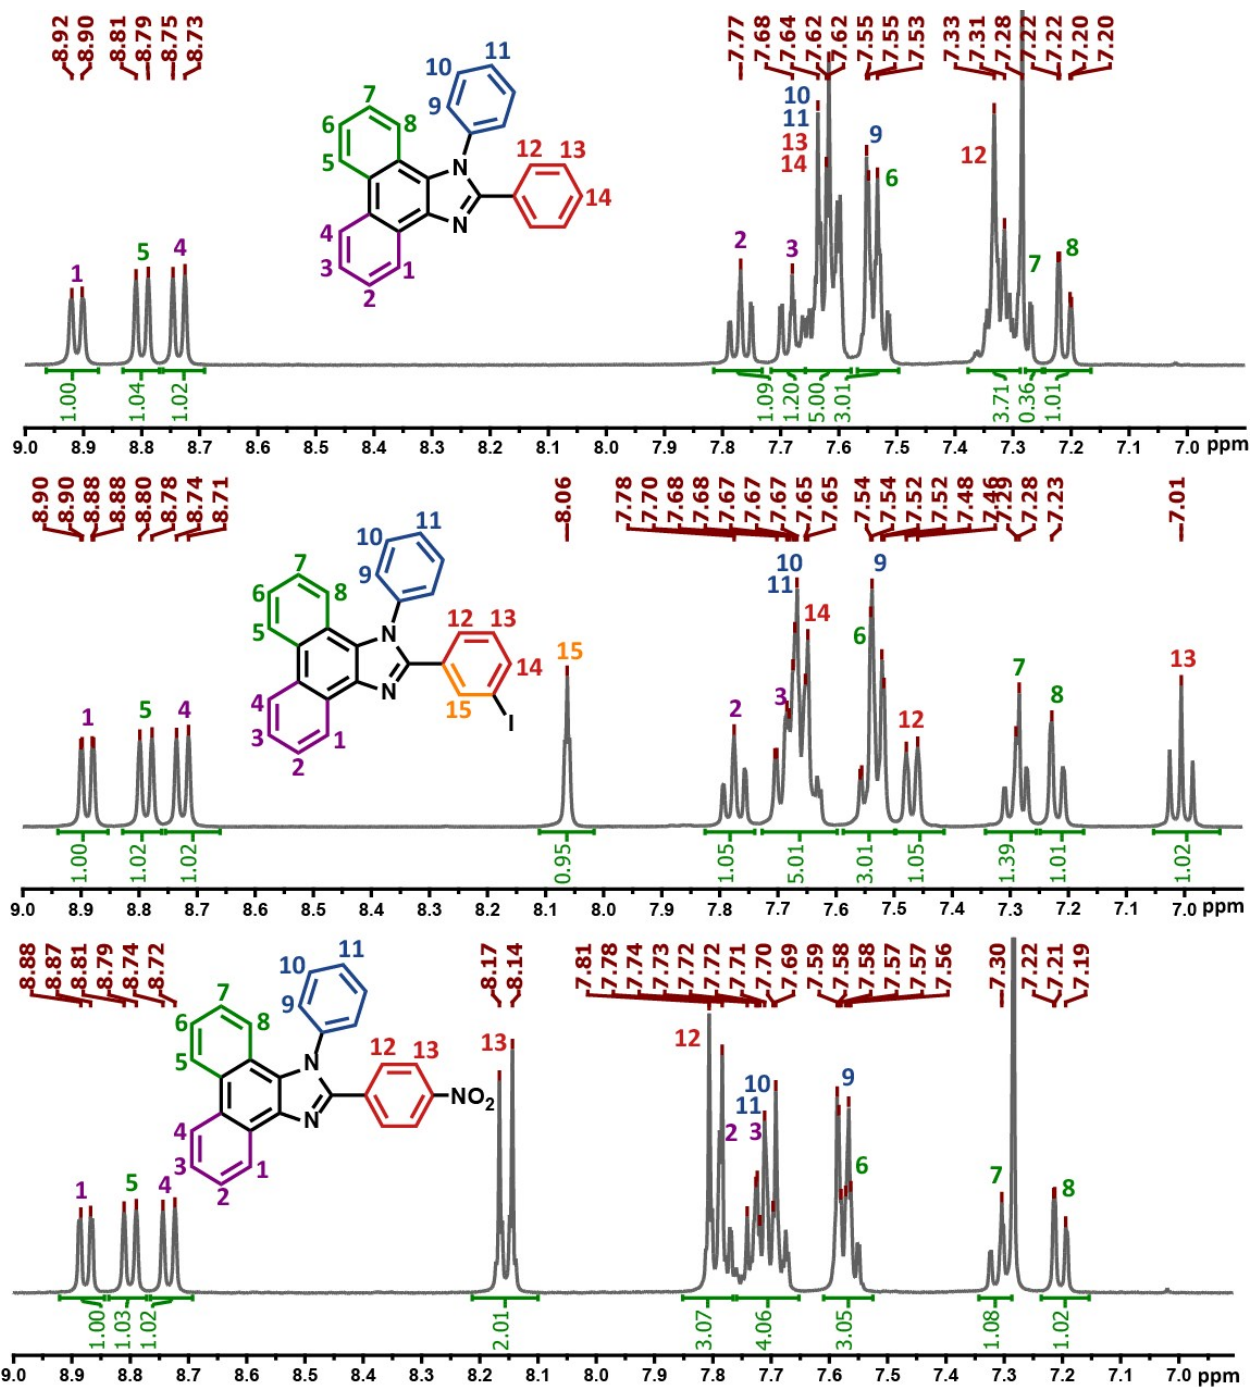

Figure S2.  $^1\text{H}$  NMR spectra of the ligands in  $\text{CDCl}_3$ , 298 K.

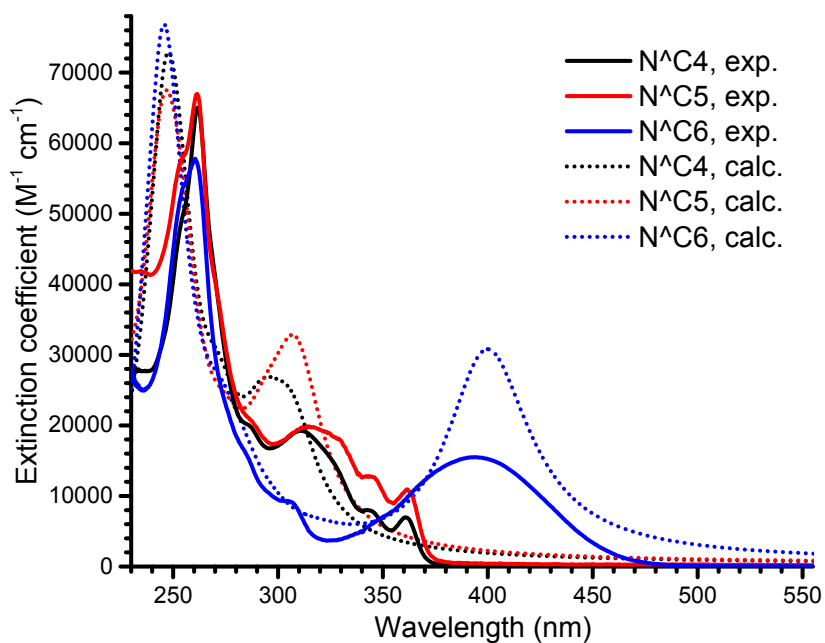

Figure S3. Experimental and calculated absorption spectra for  $N^4C4$ - $N^6C6$ .

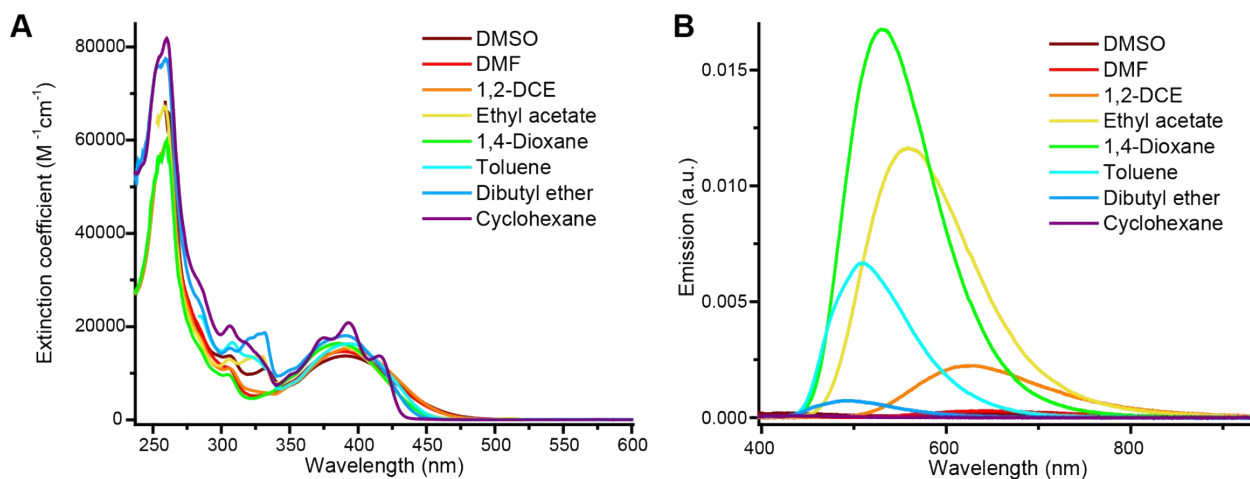

Figure S4. A. Absorption spectra of  $N^6C6$  in different solvents,  $1 \cdot 10^{-5} M$ , RT; B. Emission spectra of  $N^6C6$  in different solvents,  $N^6C6 = 1 \cdot 10^{-5} M$ ,  $\lambda_{ex} = 365 \text{ nm}$ , RT.

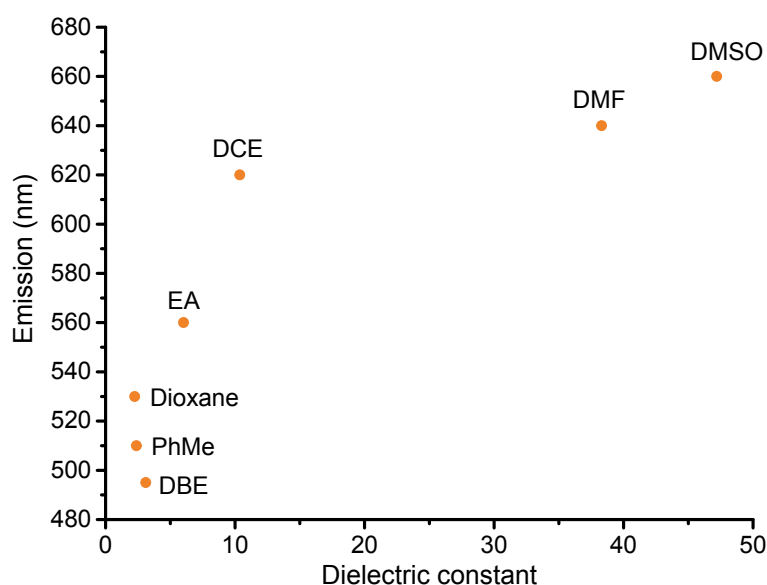

Figure S5. Correlation between emission wavelength of  $N^C6$  and solvent dielectric constant.

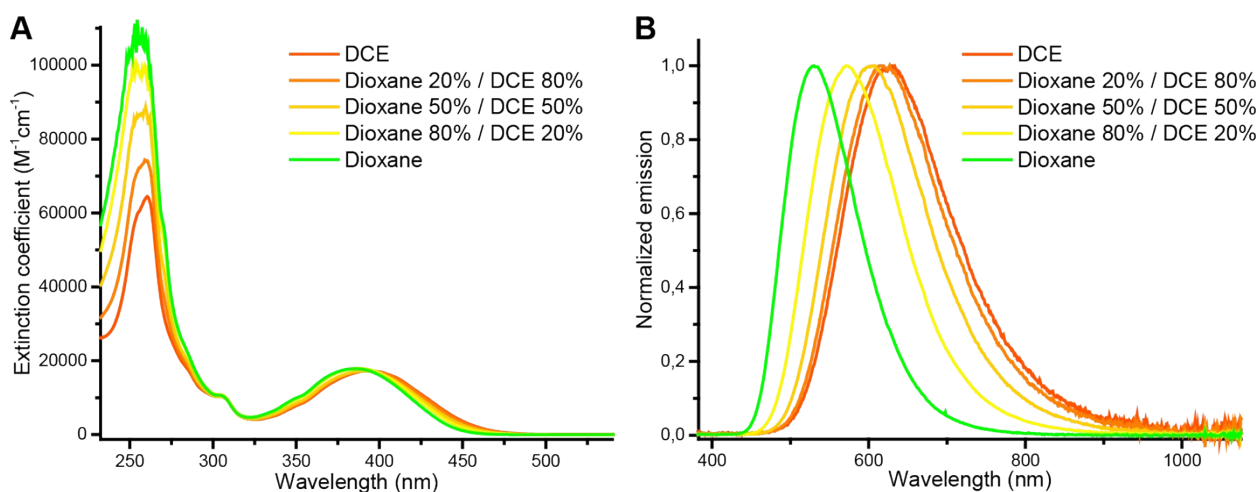

Figure S6. A. Absorption spectra of  $N^C6$  in 1,2-dichloroethane, 1,4-dioxane and their mixtures,  $c(L6) = 3 \cdot 10^{-5} M$ . B. Normalized emission spectra of  $N^C6$  in 1,2-dichloroethane, 1,4-dioxane and their mixtures,  $3 \cdot 10^{-5} M$ ,  $\lambda_{ex} = 365 nm$ , RT.

Table S1. Emission maxima of L6 in different solvents, properties of solvents: dielectric constants and polarity index.

| Solvent                  | $\lambda_{em, nm}$ | Dielectric constant, $\epsilon$ | Polarity index      | Polarity index 2 | $E_t(30)^*$  |
|--------------------------|--------------------|---------------------------------|---------------------|------------------|--------------|
| DMSO                     | 660                | 47.2                            | 7.2                 | 10.00            | 45.1 (0.444) |
| DMF                      | 640                | 38.3                            | 6.4                 | 9.21             | 43.2 (0.386) |
| 1,2-dichloroethane (DCE) | 620                | 10.36                           | 3.5                 | 8.61             | 42.3 (0.327) |
| Ethyl acetate (EA)       | 560                | 6.02                            | 4.4                 | 6.96             | 38.1 (0.228) |
| 1,4-Dioxane (DO)         | 530                | 2.25                            | 4.8                 | 5.18             | 36.0 (0.164) |
| Toluene                  | 510                | 2.38                            | 2.4                 | 6.58             | 33.9 (0.099) |
| Dibutyl ether (DBE)      | 495                | 3.10                            | 2.8 (diethyl ether) | 5.5              | 33.0 (0.071) |
| Cyclohexane              | no emission        | 2.02                            | 0.2                 | 3.49             | 30.9 (0.006) |

\*(C. Reichardt, Chem. Rev., 1994, **94**, 2319–2358.)

**Table S2. Charge transfer upon excitation of  $N^{\wedge}C4$ - $N^{\wedge}C6$  in DCE and IFCT tables for the corresponding transitions\*.**

$N^{\wedge}C4$ , abs.,  $S_0 \rightarrow S_1$ ,  
 $\lambda_{\text{calc.}} = 307 \text{ nm}$ ,  $f = 0.289$ ,  
 main NTO = 86%

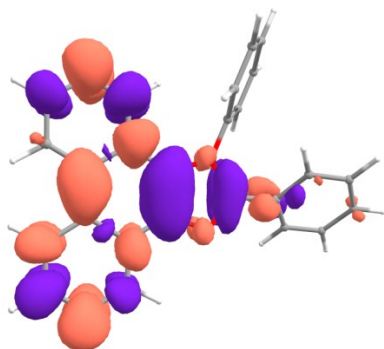

| Donor | Acceptor |       |
|-------|----------|-------|
|       | core     | Ph    |
| core  | 0.855    | 0.081 |
| Ph    | 0.058    | 0.006 |

Net ET to Ph: 0.023

$N^{\wedge}C4$ , abs.,  $S_0 \rightarrow S_2$ ,  
 $\lambda_{\text{calc.}} = 293 \text{ nm}$ ,  $f = 0.244$ ,  
 main NTO = 85%

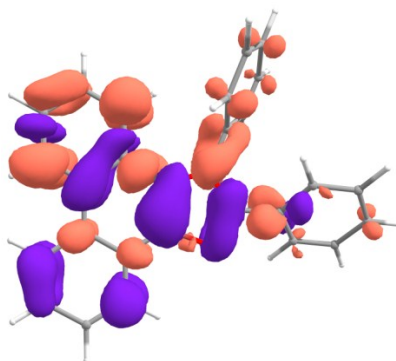

| Donor | Acceptor |       |
|-------|----------|-------|
|       | core     | Ph    |
| core  | 0.815    | 0.103 |
| Ph    | 0.072    | 0.009 |

Net ET to Ph: 0.031

$N^{\wedge}C4$ , abs.,  $S_0 \rightarrow S_3$ ,  
 $\lambda_{\text{calc.}} = 272 \text{ nm}$ ,  $f = 0.240$ ,  
 main NTO = 82%

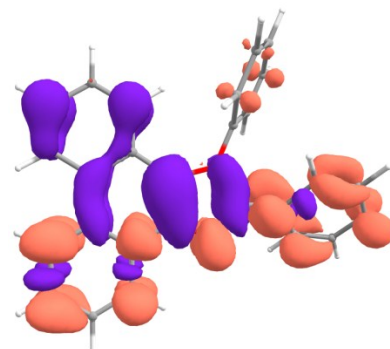

| Donor | Acceptor |       |
|-------|----------|-------|
|       | core     | Ph    |
| core  | 0.696    | 0.209 |
| Ph    | 0.073    | 0.022 |

Net ET to Ph: 0.136

$N^{\wedge}C5$ , abs.,  $S_0 \rightarrow S_1$ ,  
 $\lambda_{\text{calc.}} = 309 \text{ nm}$ ,  $f = 0.491$ ,  
 main NTO = 90%

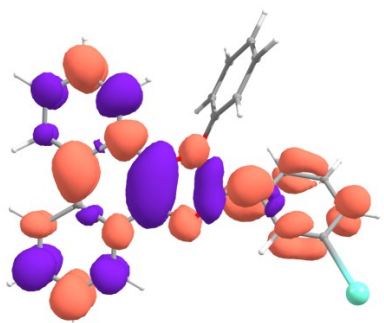

| Donor  | Acceptor |        |
|--------|----------|--------|
|        | core     | m-I-Ph |
| core   | 0.736    | 0.181  |
| m-I-Ph | 0.067    | 0.016  |

Net ET to m-I-Ph: 0.114

$N^{\wedge}C5$ , abs.,  $S_0 \rightarrow S_2$ ,  
 $\lambda_{\text{calc.}} = 294 \text{ nm}$ ,  $f = 0.187$ ,  
 main NTO = 82%

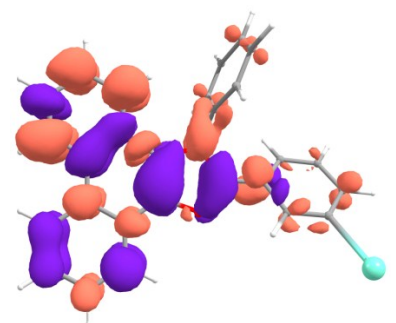

| Donor  | Acceptor |        |
|--------|----------|--------|
|        | core     | m-I-Ph |
| core   | 0.819    | 0.115  |
| m-I-Ph | 0.058    | 0.008  |

Net ET to m-I-Ph: 0.056

$N^{\wedge}C5$ , abs.,  $S_0 \rightarrow S_3$ ,  
 $\lambda_{\text{calc.}} = 275 \text{ nm}$ ,  $f = 0.132$ ,  
 main NTO = 75%

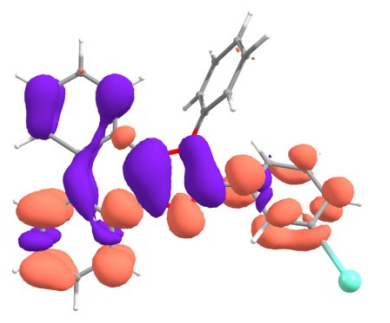

| Donor  | Acceptor |        |
|--------|----------|--------|
|        | core     | m-I-Ph |
| core   | 0.672    | 0.206  |
| m-I-Ph | 0.094    | 0.029  |

Net ET to m-I-Ph: 0.112

$N^{\wedge}C6$ , abs.,  $S_0 \rightarrow S_1$ ,  
 $\lambda_{\text{calc.}} = 400 \text{ nm}$ ,  $f = 0.602$ ,  
 main NTO = 99%

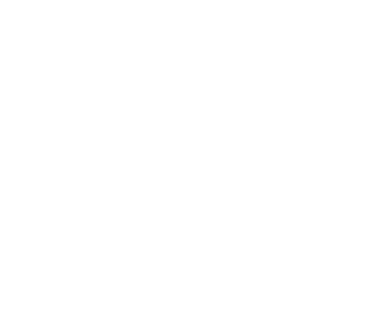

$N^{\wedge}C6$ , abs.,  $S_0 \rightarrow S_2$ ,  
 $\lambda_{\text{calc.}} = 338 \text{ nm}$ ,  $f = 0.001$ ,  
 main NTO = 100%

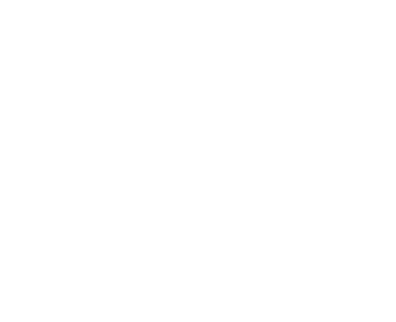

$N^{\wedge}C6$ , abs.,  $S_0 \rightarrow S_3$ ,  
 $\lambda_{\text{calc.}} = 320 \text{ nm}$ ,  $f = 0.020$ ,  
 main NTO = 97%

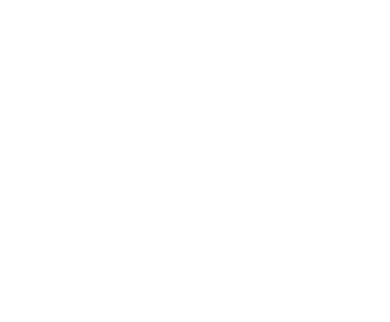

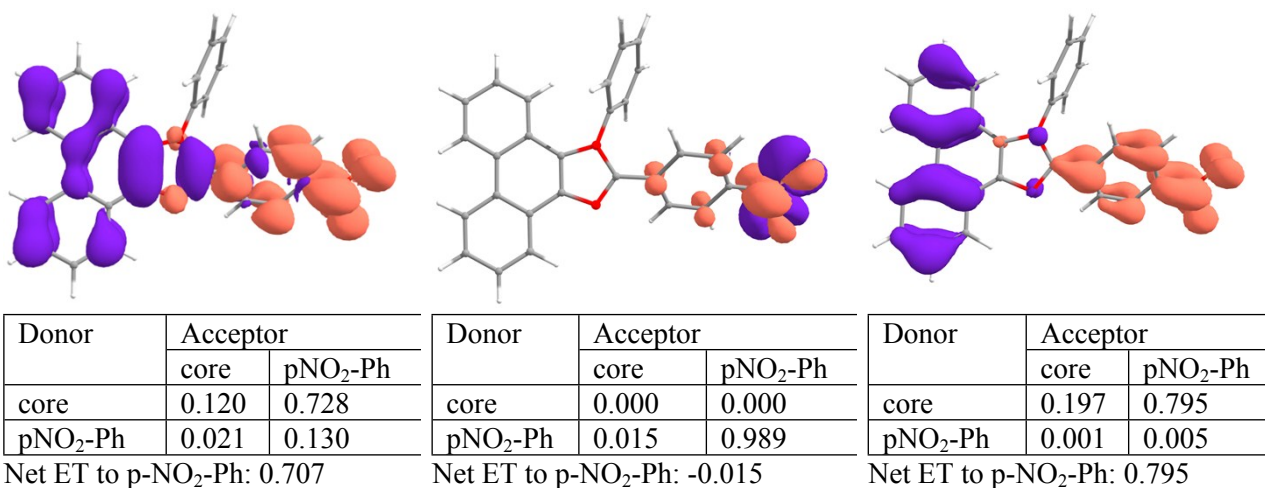

**N<sup>+</sup>C6H<sup>+</sup>**, abs., S<sub>0</sub>→S<sub>1</sub>,  
 $\lambda_{\text{calc.}} = 358 \text{ nm}$ ,  $f=0.587$ ,  
 main NTO = 95%

**N<sup>+</sup>C6H<sup>+</sup>**, abs., S<sub>0</sub>→S<sub>2</sub>,  
 $\lambda_{\text{calc.}} = 340 \text{ nm}$ ,  $f=0.012$ ,  
 main NTO = 94%

**N<sup>+</sup>C6H<sup>+</sup>**, abs., S<sub>0</sub>→S<sub>3</sub>,  
 $\lambda_{\text{calc.}} = 319 \text{ nm}$ ,  $f=0.014$ ,  
 main NTO = 97%

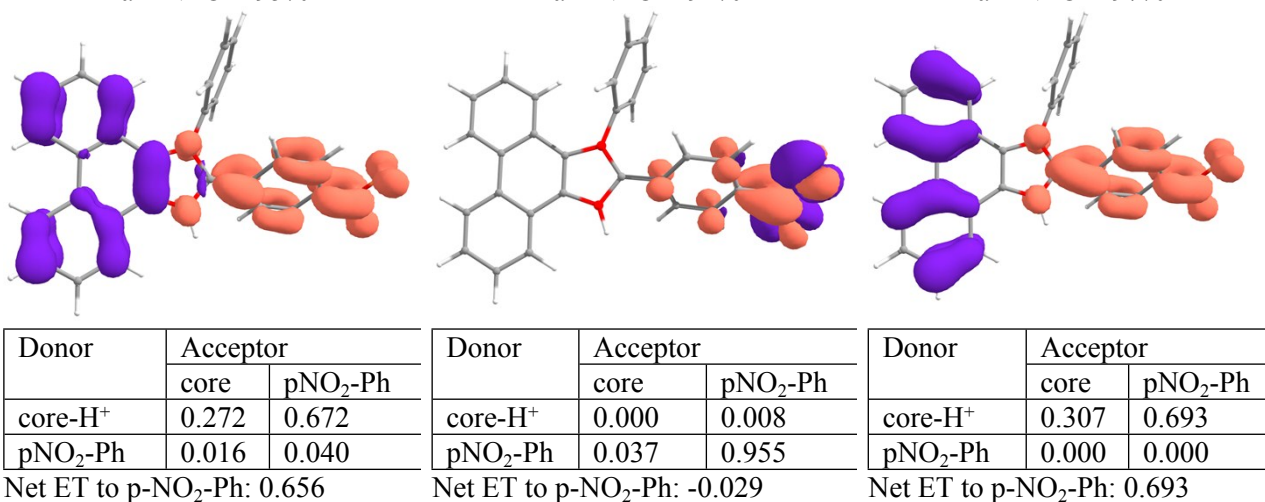

**Table S3. Charge transfer upon emission of N<sup>+</sup>C4-N<sup>+</sup>C6 and -N<sup>+</sup>C6H<sup>+</sup> in DCE and IFCT tables for S<sub>1</sub>→S<sub>0</sub> transition\*.**

**N<sup>+</sup>C4**, em., S<sub>1</sub>→S<sub>0</sub>, 383 nm

**N<sup>+</sup>C5**, em., S<sub>1</sub>→S<sub>0</sub>, 389 nm

**N<sup>+</sup>C6**, em., S<sub>1</sub>→S<sub>0</sub>, 511 nm

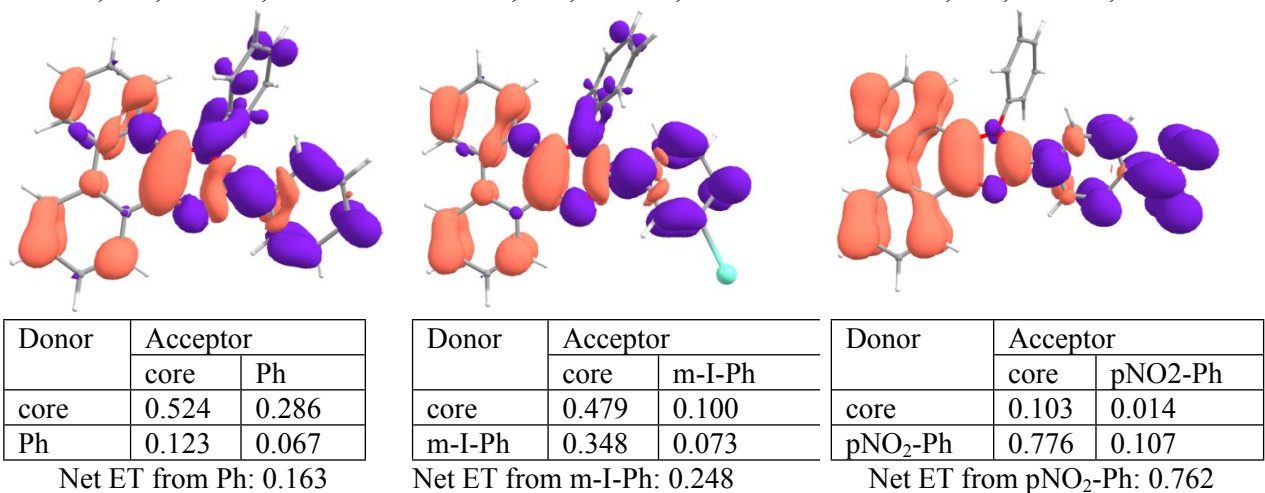



$N^{\wedge}C6H^+$ , em., S0→S1, 477 nm

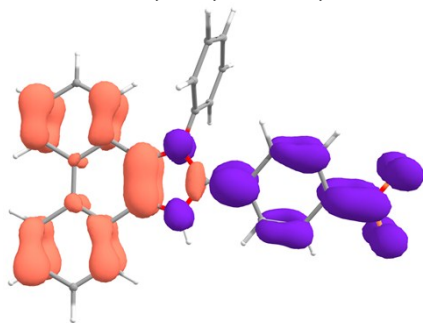

| Donor                | Acceptor            |                      |
|----------------------|---------------------|----------------------|
|                      | core-H <sup>+</sup> | pNO <sub>2</sub> -Ph |
| core-H <sup>+</sup>  | 0.288               | 0.040                |
| pNO <sub>2</sub> -Ph | 0.590               | 0.082                |

Net ET to p-NO<sub>2</sub>-Ph: 0.550

\* The figures show variations in electronic density upon excitation and emission. Violet and terracotta are depletion and increase of electronic density, respectively. Main NTO is contribution of main NTO couple into transition. The data for the corresponding interfragment charge transfer (IFCT) are given below the figures. Diagonal values represent intraligand transitions, off-diagonal values represent a charge transfer from “Donor” to “Acceptor”. Core - phenanthro-imidazole fragment, Ph – phenyl, m-I-Ph – m-iodophenyl, p-NO<sub>2</sub>-Ph – p-nitrophenyl. Net electron transfer (Net ET) values, calculated from IFCT.

**Table S4. Experimental and calculated values for low energy absorption and emission for  $N^{\wedge}C4$ - $N^{\wedge}C6$ , including the data for  $N^{\wedge}C6$  in different solvents.**

| Ligand (Solvent)               | $\lambda_{\text{abs}}$ (exp.) nm | $\lambda_{\text{abs}}$ (calc.) nm | $\lambda_{\text{em}}$ (exp.) nm | $\lambda_{\text{em}}$ (calc. PCM model) nm | $N^{\wedge}C6 + 1$ solvent $\lambda_{\text{em}}$ (calc.) nm | $N^{\wedge}C6 + 2$ solvent $\lambda_{\text{em}}$ (calc.) nm | $N^{\wedge}C6 + 3$ solvent $\lambda_{\text{em}}$ (calc.) nm | $N^{\wedge}C6 + 4$ solvent $\lambda_{\text{em}}$ (calc.) nm |
|--------------------------------|----------------------------------|-----------------------------------|---------------------------------|--------------------------------------------|-------------------------------------------------------------|-------------------------------------------------------------|-------------------------------------------------------------|-------------------------------------------------------------|
| $N^{\wedge}C4$ (DCE)           | 361                              | 307                               | 370                             | 383                                        | –                                                           | –                                                           | –                                                           | –                                                           |
| $N^{\wedge}C5$ (DCE)           | 361                              | 309                               | 370                             | 389                                        | –                                                           | –                                                           | –                                                           | –                                                           |
| $N^{\wedge}C6$ (DCE)           | 390                              | 400                               | 620                             | 511                                        | 517                                                         | 528                                                         |                                                             | 538                                                         |
| $N^{\wedge}C6H^+$ (DCE)        | 356                              | 356                               | 586                             | 477                                        | –                                                           | –                                                           | –                                                           | –                                                           |
| $N^{\wedge}C6$ (Cyclohexane)   | 416                              | 391                               | –*                              | 460                                        | –                                                           | –                                                           | –                                                           | –                                                           |
| $N^{\wedge}C6$ (Diethyl ether) | 392**                            | 396                               | 495**                           | 489                                        | –                                                           | –                                                           | –                                                           | –                                                           |
| $N^{\wedge}C6$ (DMSO)          | 392                              | 401                               | 660                             | 528                                        | 541                                                         | 570                                                         | 588                                                         | 595                                                         |
| $N^{\wedge}C6$ (Toluene)       | 394                              | 393                               | 510                             | 467                                        | 480                                                         | 500                                                         |                                                             |                                                             |
| $N^{\wedge}C6$ (1,4-Dioxane)   | 386                              | 391                               | 530                             | 464                                        | 475                                                         | 482                                                         | 508                                                         | 520                                                         |
| $N^{\wedge}C6$ (Ethyl acetate) | 386                              | 398                               | 560                             | 499                                        | 508                                                         |                                                             |                                                             |                                                             |

\* — no emission; \*\* — in dibutyl ether.

The crystal structures of **1**, **2**, **4-6** and  $N^{\wedge}C6$  were determined by the means of single crystal X-ray diffraction analysis. Crystals were fixed on a micro mounts and the diffraction data have been collected on the various Rigaku Oxford Diffraction diffractometers at a temperature of 100K. Crystals of **1** and  $N^{\wedge}C6$  were placed on the Excalibur Eos diffractometer and measured using monochromated MoK $\alpha$  radiation. Crystal of **2** was placed on the SuperNova Atlas diffractometer and measured using monochromated microfocused CuK $\alpha$  radiation. Crystals of **4-6** were placed on XtaLAB HyPix-3000 diffractometer and measured using monochromated microfocused CuK $\alpha$  radiation. Data were integrated and corrected for background, Lorentz, and polarization effects. An empirical absorption correction based on spherical harmonics implemented in the SCALE3 ABSPACK algorithm was applied in *CrysAlisPro* program.<sup>37</sup> The unit-cell parameters (Tables S6) were refined by the least-squares techniques. The structures

were solved by direct methods or dual-space algorithm and refined using the *SHELX* programs<sup>38,39</sup> incorporated in the *OLEX2* program package.<sup>40</sup> The final models included coordinates and anisotropic displacement parameters for all non-H atoms. The carbon and nitrogen-bound H atoms were placed in calculated positions and were included in the refinement in the ‘riding’ model approximation,  $U_{iso}(H)$  set to  $1.5U_{eq}(C)$  and C–H 0.96 Å for the CH<sub>3</sub> groups,  $U_{iso}(H)$  set to  $1.2U_{eq}(C)$  and C–H 0.97 Å for the CH<sub>2</sub> groups,  $U_{iso}(H)$  set to  $1.2U_{eq}(C)$  and C–H 0.93 Å for the CH groups of the cyclic fragments, and  $U_{iso}(H)$  set to  $1.2U_{eq}(C)$  and C–H 0.98 Å for the tertiary CH groups. The unit cells of **4-6** contain disordered solvent molecules which have been treated as a diffuse contribution to the overall scattering without specific atom positions by SQUEEZE/PLATON.<sup>41</sup> The total Potential Solvent Accessible Void Vol in **4** is 444 Å<sup>3</sup> and electron Count Voids / Cell = 98 that is approximately equal to 1 acetone molecule per formula unit. The total Potential Solvent Accessible Void Vol in **5** is 3033 Å<sup>3</sup> and electron Count Voids / Cell = 893 that is approximately equal to 1 chloroform and 1 diethyl ether molecule per formula unit. The total Potential Solvent Accessible Void Vol in **6** is 779 Å<sup>3</sup> and electron Count Voids / Cell = 94 that is approximately equal to 0.5 acetonitrile molecules per formula unit. The crystal structures of **2** and N<sup>^</sup>C**6** were refined as an inversion twins. Supplementary crystallographic data for this paper have been deposited at Cambridge Crystallographic Data Centre (CCDC 1964885 - 1964890) and can be obtained free of charge via [www.ccdc.cam.ac.uk/structures/](http://www.ccdc.cam.ac.uk/structures/).

**Table S5.** Selected bond distances (Å) and angles (°).

| 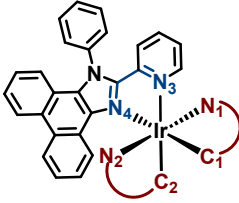 | <b>1</b>   | <b>2</b>  | <b>4</b>              | <b>5</b>  | <b>6</b>  |
|-------------------------------------------------------------------------------------|------------|-----------|-----------------------|-----------|-----------|
| Distances, Å                                                                        |            |           |                       |           |           |
| Ir–C1                                                                               | 1.998(3)   | 2.014(10) | 1.996(5)/1.988(5)     | 2.008(10) | 2.000(3)  |
| Ir–N1                                                                               | 2.035(3)   | 2.043(8)  | 2.093(4)/2.079(5)     | 2.104(7)  | 2.120(2)  |
| Ir–C2                                                                               | 2.018(3)   | 2.014(10) | 2.031(5)/2.009(5)     | 2.036(10) | 2.034(2)  |
| Ir–N2                                                                               | 2.051(3)   | 2.069(8)  | 2.075(4)/2.080(5)     | 2.098(7)  | 2.100(2)  |
| Ir–N3                                                                               | 2.166(3)   | 2.147(9)  | 2.137(5)/2.167(4)     | 2.210(6)  | 2.161(2)  |
| Ir–N4                                                                               | 2.242(3)   | 2.199(8)  | 2.258(4)/2.320(4)     | 2.282(7)  | 2.294(2)  |
| Angles, °                                                                           |            |           |                       |           |           |
| N1–Ir–C1                                                                            | 80.75(12)  | 80.3(4)   | 80.65(19)/79.7(2)     | 79.8(3)   | 79.65(9)  |
| N2–Ir–C2                                                                            | 80.53(12)  | 79.9(4)   | 79.30(19)/79.88(19)   | 79.7(3)   | 79.53(9)  |
| N3–Ir–N4                                                                            | 75.28(10)  | 76.2(3)   | 74.53(16)/74.68(15)   | 75.3(2)   | 74.85(8)  |
| C1–Ir–C2                                                                            | 84.52(13)  | 85.3(4)   | 86.9(2)/88.8(2)       | 84.3(3)   | 83.94(9)  |
| C2–Ir–N1                                                                            | 93.45(12)  | 98.9(4)   | 94.24(19)/92.0(2)     | 91.5(4)   | 92.88(9)  |
| C2–Ir–N4                                                                            | 107.73(11) | 102.3(3)  | 100.86(18)/103.09(18) | 105.2(3)  | 101.94(9) |
| C1–Ir–N2                                                                            | 95.47(12)  | 96.5(4)   | 92.25(19)/94.0(2)     | 93.9(3)   | 93.04(9)  |
| N2–Ir–N4                                                                            | 88.32(10)  | 87.4(3)   | 80.00(16)/79.69(16)   | 78.9(3)   | 77.32(7)  |
| N4–Ir–N1                                                                            | 96.54(10)  | 95.9(3)   | 107.98(16)/108.25(16) | 108.9(3)  | 110.83(7) |
| N3–Ir–N2                                                                            | 97.36(10)  | 95.5(3)   | 98.55(17)/103.67(17)  | 107.4(3)  | 104.32(8) |
| N3–Ir–N1                                                                            | 88.47(10)  | 85.8(3)   | 88.37(17)/84.81(17)   | 81.5(3)   | 83.78(8)  |
| N3–Ir–C1                                                                            | 92.55(11)  | 96.3(4)   | 97.47(18)/94.08(19)   | 96.5(3)   | 100.21(9) |





Table S6. Crystallographic data for 1, 2, 4, 5, 6 and N^C6.

| Compound                                          | 1                                                                                                       | 2                                                                                                                                                                                           | 4                                                                                                                                                             | 5                                                                                 | 6                                                                                                                                     | N^C6                                                          |
|---------------------------------------------------|---------------------------------------------------------------------------------------------------------|---------------------------------------------------------------------------------------------------------------------------------------------------------------------------------------------|---------------------------------------------------------------------------------------------------------------------------------------------------------------|-----------------------------------------------------------------------------------|---------------------------------------------------------------------------------------------------------------------------------------|---------------------------------------------------------------|
| Formula                                           | C <sub>48</sub> H <sub>33</sub> IrN <sub>5</sub> , (C HCl <sub>3</sub> ) <sub>3</sub> , PF <sub>6</sub> | C <sub>52</sub> H <sub>33</sub> IrN <sub>5</sub> S <sub>2</sub> , (C <sub>4</sub> H <sub>10</sub> O) <sub>2.13</sub> , (CH <sub>2</sub> Cl <sub>2</sub> ) <sub>0.75</sub> , PF <sub>6</sub> | C <sub>80</sub> H <sub>51</sub> IrN <sub>7</sub> , PF <sub>6</sub> , (CHCl <sub>3</sub> ) <sub>0.13</sub> , (C <sub>3</sub> H <sub>6</sub> O) <sub>0.25</sub> | C <sub>80</sub> H <sub>49</sub> I <sub>2</sub> IrN <sub>7</sub> , PF <sub>6</sub> | C <sub>80</sub> H <sub>49</sub> IrN <sub>9</sub> O <sub>4</sub> , PF <sub>6</sub> , (C <sub>4</sub> H <sub>10</sub> O) <sub>0.5</sub> | C <sub>27</sub> H <sub>17</sub> N <sub>3</sub> O <sub>2</sub> |
| Crystal System                                    | Monoclinic                                                                                              | Orthorhombic                                                                                                                                                                                | Triclinic                                                                                                                                                     | Monoclinic                                                                        | Monoclinic                                                                                                                            | Orthorhombic                                                  |
| <i>a</i> (Å)                                      | 13.7115(2)                                                                                              | 35.6730(5)                                                                                                                                                                                  | 17.5554(2)                                                                                                                                                    | 52.252(2)                                                                         | 30.2713(6)                                                                                                                            | 27.1016(9)                                                    |
| <i>b</i> (Å)                                      | 18.8612(3)                                                                                              | 33.4826(5)                                                                                                                                                                                  | 20.8344(3)                                                                                                                                                    | 13.6314(4)                                                                        | 15.7377(2)                                                                                                                            | 11.3994(5)                                                    |
| <i>c</i> (Å)                                      | 21.0299(4)                                                                                              | 19.7402(2)                                                                                                                                                                                  | 21.1839(4)                                                                                                                                                    | 23.8081(9)                                                                        | 31.0641(6)                                                                                                                            | 6.2796(3)                                                     |
| <i>α</i> (°)                                      | 90                                                                                                      | 90                                                                                                                                                                                          | 61.714(2)                                                                                                                                                     | 90                                                                                | 90                                                                                                                                    | 90                                                            |
| <i>β</i> (°)                                      | 108.308(2)                                                                                              | 90                                                                                                                                                                                          | 86.958(1)                                                                                                                                                     | 120.633(5)                                                                        | 113.642(2)                                                                                                                            | 90                                                            |
| <i>γ</i> (°)                                      | 90                                                                                                      | 90                                                                                                                                                                                          | 82.312(1)                                                                                                                                                     | 90                                                                                | 90                                                                                                                                    | 90                                                            |
| <i>V</i> (Å <sup>3</sup> )                        | 5163.36(16)                                                                                             | 23578.1(6)                                                                                                                                                                                  | 6761.2(2)                                                                                                                                                     | 14591.3(11)                                                                       | 13556.9(5)                                                                                                                            | 1940.03(14)                                                   |
| Molecular weight                                  | 1375.07                                                                                                 | 1350.32                                                                                                                                                                                     | 1476.89                                                                                                                                                       | 1699.23                                                                           | 1574.51                                                                                                                               | 415.43                                                        |
| Space group                                       | <i>P</i> 2 <sub>1</sub> / <i>n</i>                                                                      | <i>F</i> dd2                                                                                                                                                                                | <i>P</i> -1                                                                                                                                                   | <i>C</i> 2/ <i>c</i>                                                              | <i>C</i> 2/ <i>c</i>                                                                                                                  | <i>P</i> na2 <sub>1</sub>                                     |
| <i>μ</i> (mm <sup>-1</sup> )                      | 3.147                                                                                                   | 6.489                                                                                                                                                                                       | 4.745                                                                                                                                                         | 10.916                                                                            | 4.697                                                                                                                                 | 0.092                                                         |
| Temperature (K)                                   | 100(2)                                                                                                  | 100(2)                                                                                                                                                                                      | 100(2)                                                                                                                                                        | 100(2)                                                                            | 100(2)                                                                                                                                | 100(2)                                                        |
| <i>Z</i>                                          | 8                                                                                                       | 16                                                                                                                                                                                          | 4                                                                                                                                                             | 8                                                                                 | 8                                                                                                                                     | 2                                                             |
| <i>D</i> <sub>calc</sub> (g/cm <sup>3</sup> )     | 1.769                                                                                                   | 1.522                                                                                                                                                                                       | 1.451                                                                                                                                                         | 1.547                                                                             | 1.543                                                                                                                                 | 1.422                                                         |
| Crystal size (mm <sup>3</sup> )                   | 0.21 × 0.17 × 0.11                                                                                      | 0.18 × 0.12 × 0.09                                                                                                                                                                          | 0.37 × 0.23 × 0.02                                                                                                                                            | 0.30 × 0.06 × 0.02                                                                | 0.08 × 0.05 × 0.02                                                                                                                    | 0.19 × 0.02 × 0.01                                            |
| Diffractometer                                    | Xcalibur Eos                                                                                            | SuperNova Atlas                                                                                                                                                                             | XtaLAB HyPix-3000                                                                                                                                             | SuperNova Atlas                                                                   | XtaLAB HyPix-3000                                                                                                                     | Xcalibur Eos                                                  |
| Radiation                                         | MoK $\alpha$                                                                                            | CuK $\alpha$                                                                                                                                                                                | CuK $\alpha$                                                                                                                                                  | CuK $\alpha$                                                                      | CuK $\alpha$                                                                                                                          | MoK $\alpha$                                                  |
| Total reflections                                 | 52304                                                                                                   | 117136                                                                                                                                                                                      | 25580                                                                                                                                                         | 13113                                                                             | 12833                                                                                                                                 | 19264                                                         |
| Unique reflections                                | 11856                                                                                                   | 11113                                                                                                                                                                                       | 25580                                                                                                                                                         | 13113                                                                             | 12833                                                                                                                                 | 4446                                                          |
| Angle range 2 $\theta$ (°)                        | 5.33–55.00                                                                                              | 5.76–140.00                                                                                                                                                                                 | 4.74–140.00                                                                                                                                                   | 6.78–140.00                                                                       | 6.37–140.00                                                                                                                           | 5.75–55.00                                                    |
| Reflections with $ F_o  \geq 4\sigma_F$           | 10295                                                                                                   | 10878                                                                                                                                                                                       | 21537                                                                                                                                                         | 7432                                                                              | 12011                                                                                                                                 | 4014                                                          |
| <i>R</i> <sub>int</sub>                           | 0.0408                                                                                                  | 0.0779                                                                                                                                                                                      | Merged                                                                                                                                                        | Merged                                                                            | Merged                                                                                                                                | 0.0515                                                        |
| <i>R</i> <sub><math>\sigma</math></sub>           | 0.0335                                                                                                  | 0.0288                                                                                                                                                                                      | 0.0359                                                                                                                                                        | 0.1009                                                                            | 0.0192                                                                                                                                | 0.0478                                                        |
| <i>R</i> <sub>1</sub> ( $ F_o  \geq 4\sigma_F$ )  | 0.0304                                                                                                  | 0.0610                                                                                                                                                                                      | 0.0560                                                                                                                                                        | 0.0617                                                                            | 0.0266                                                                                                                                | 0.0435                                                        |
| <i>wR</i> <sub>2</sub> ( $ F_o  \geq 4\sigma_F$ ) | 0.0697                                                                                                  | 0.1578                                                                                                                                                                                      | 0.1619                                                                                                                                                        | 0.1420                                                                            | 0.0679                                                                                                                                | 0.0898                                                        |
| <i>R</i> <sub>1</sub> (all data)                  | 0.0384                                                                                                  | 0.0617                                                                                                                                                                                      | 0.0651                                                                                                                                                        | 0.1034                                                                            | 0.0287                                                                                                                                | 0.0513                                                        |
| <i>wR</i> <sub>2</sub> (all data)                 | 0.0751                                                                                                  | 0.1590                                                                                                                                                                                      | 0.1687                                                                                                                                                        | 0.1576                                                                            | 0.0691                                                                                                                                | 0.0935                                                        |
| <i>S</i>                                          | 1.043                                                                                                   | 1.067                                                                                                                                                                                       | 1.075                                                                                                                                                         | 0.898                                                                             | 1.037                                                                                                                                 | 1.058                                                         |
| $\rho_{\min}$ , $\rho_{\max}$ , e/Å <sup>3</sup>  | -1.503, 1.937                                                                                           | -1.569, 2.012                                                                                                                                                                               | -2.832, 3.292                                                                                                                                                 | -1.309, 1.262                                                                     | -0.976, 1.044                                                                                                                         | -0.234, 0.267                                                 |
| CCDC                                              | 1964885                                                                                                 | 1964886                                                                                                                                                                                     | 1964887                                                                                                                                                       | 1964888                                                                           | 1964889                                                                                                                               | 1964890                                                       |

$R_1 = \sum ||F_o| - |F_c|| / \sum |F_o|$ ;  $wR_2 = \{ \sum [w(F_o^2 - F_c^2)^2] / \sum [w(F_o^2)^2] \}^{1/2}$ ;  $w = 1 / [\sigma^2(F_o^2) + (aP)^2 + bP]$ , where  $P = (F_o^2 + 2F_c^2) / 3$ ;  $s = \{ \sum [w(F_o^2 - F_c^2)] / (n - p) \}^{1/2}$  where  $n$  is the number of reflections and  $p$  is the number of refinement parameters.

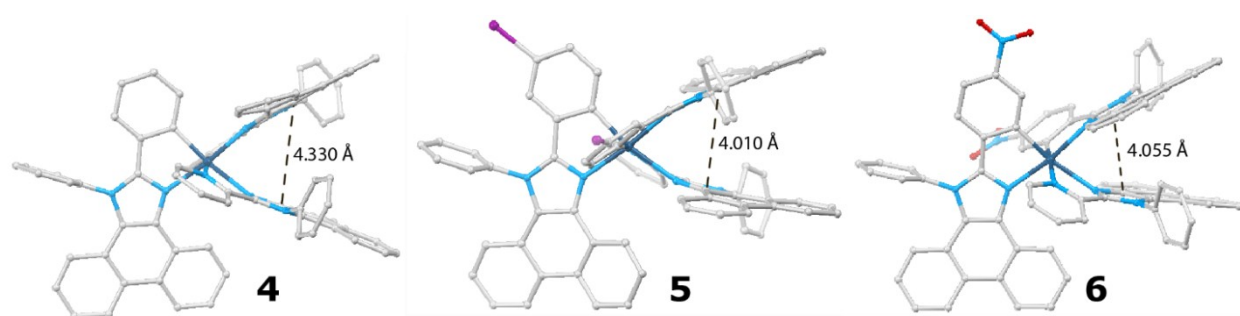

**Figure S7.** Intramolecular  $\pi$ - $\pi$  interaction in the solid state structure of 4-6.

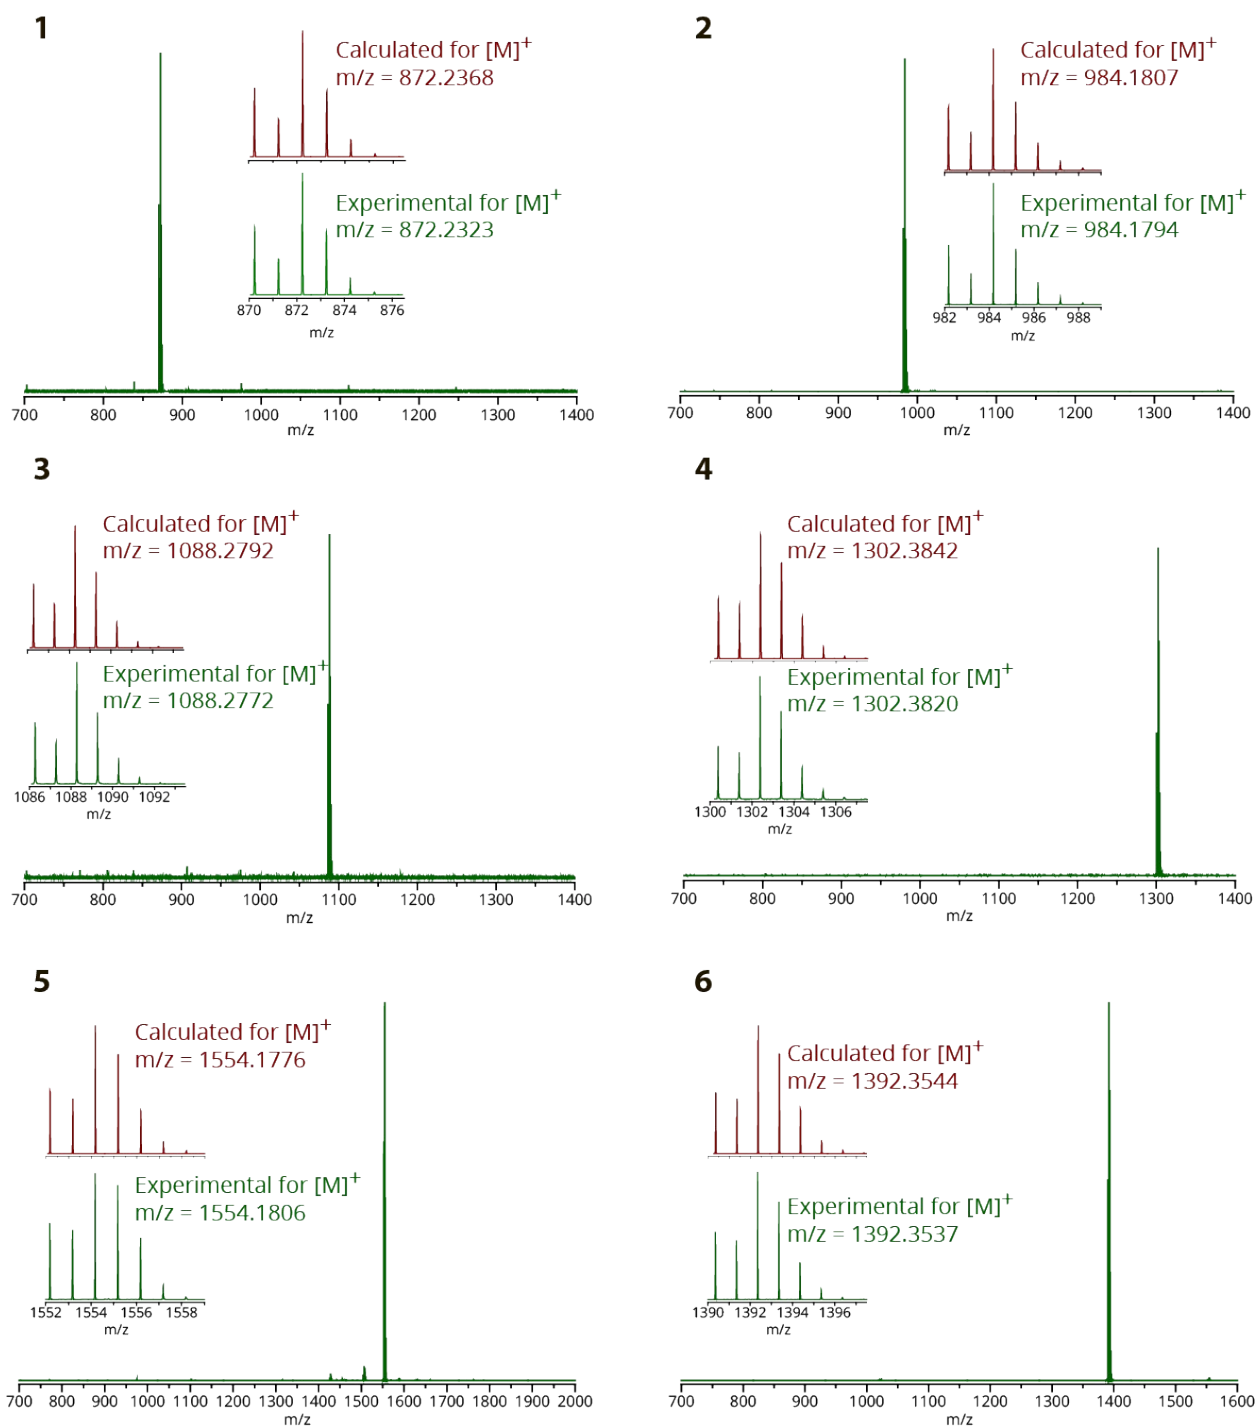

**Figure S8.** Experimental and calculated ESI<sup>+</sup> mass spectra of 1-6.

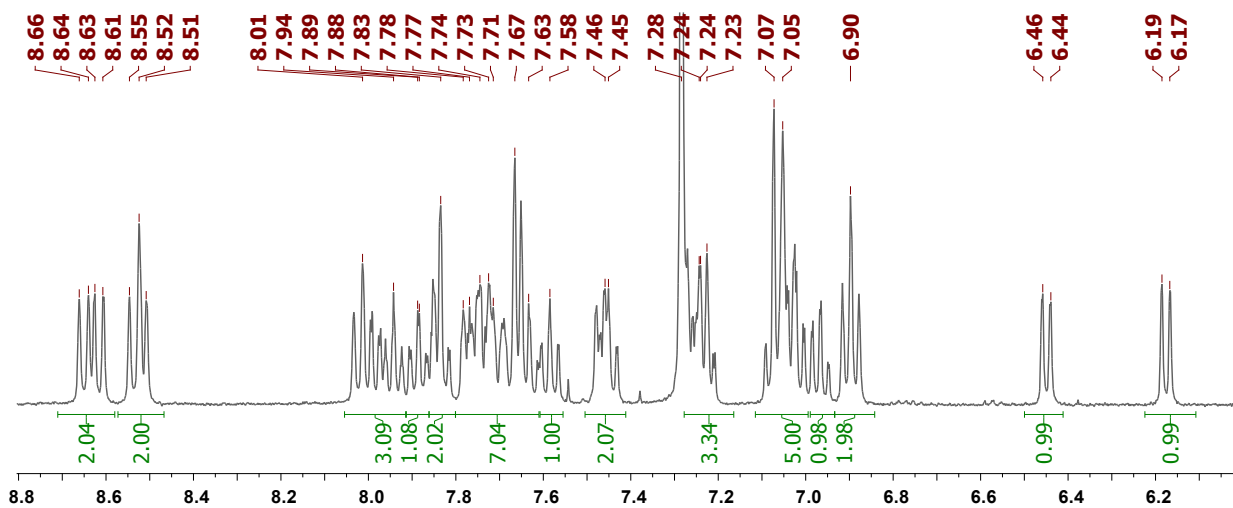

Figure S9.  $^1\text{H}$  NMR spectrum of **1** in  $\text{CDCl}_3$ , 298 K.

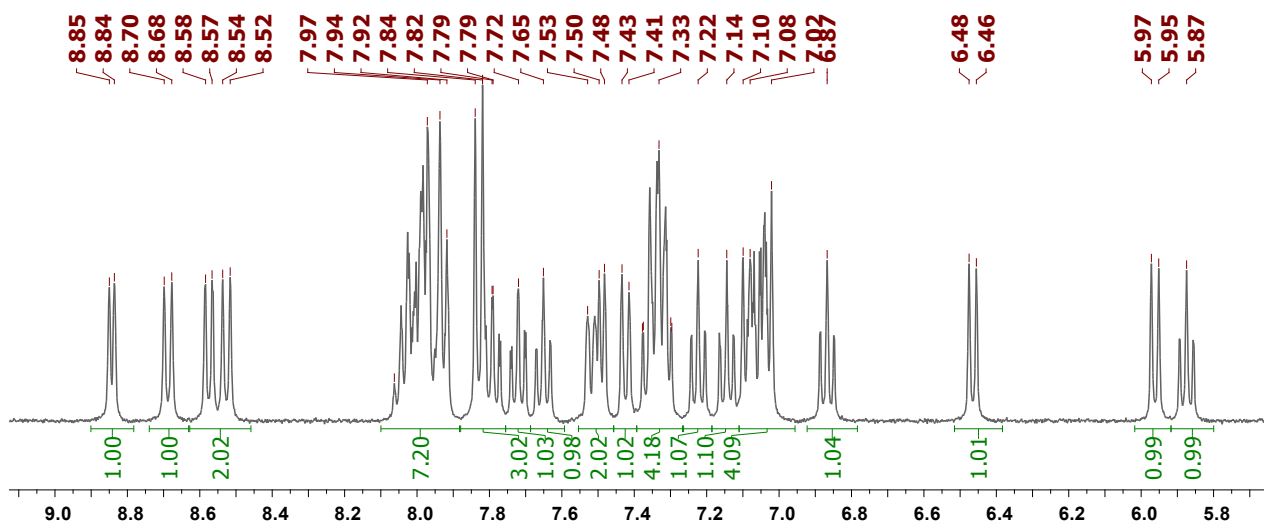

Figure S10.  $^1\text{H}$  NMR spectrum of **2** in  $\text{CD}_2\text{Cl}_2$ , 298 K.

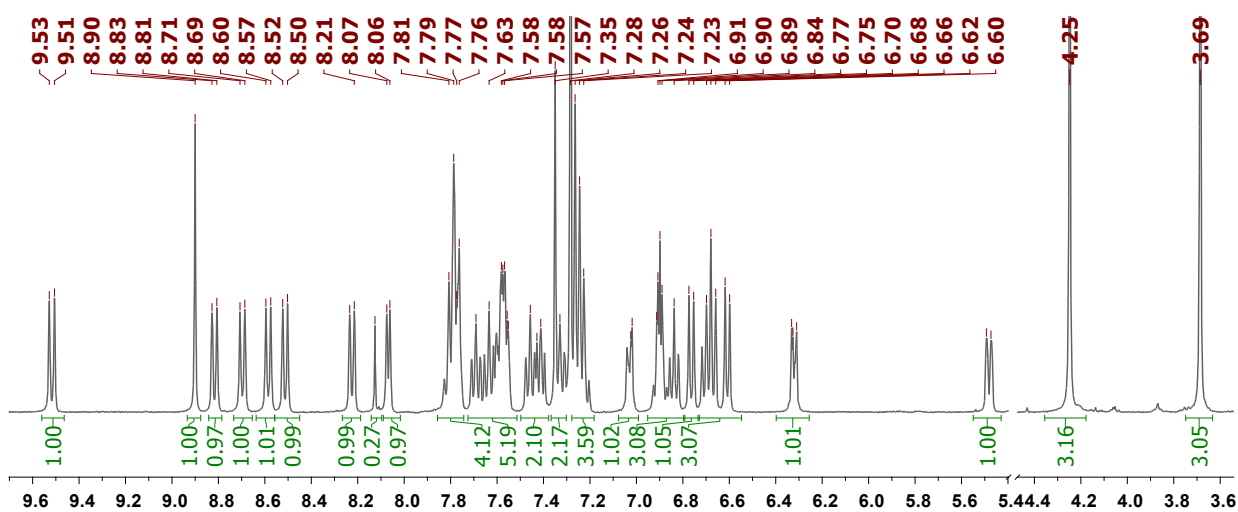

Figure S11.  $^1\text{H}$  NMR spectrum of **3** in  $\text{CDCl}_3$ , 298 K.

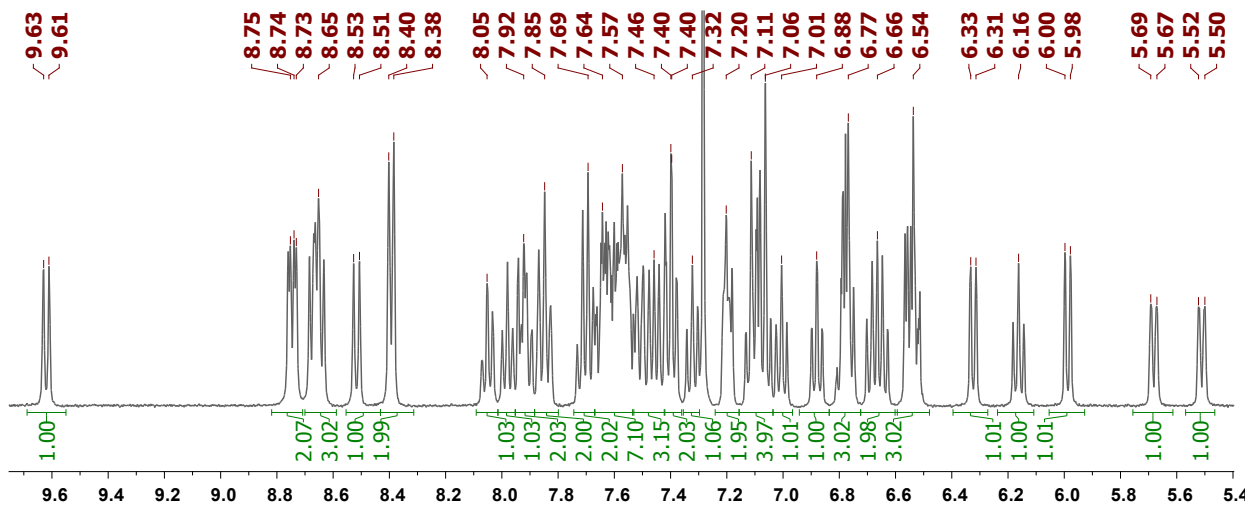

Figure S12.  $^1\text{H}$  NMR spectrum of **4** in  $\text{CDCl}_3$ , 298 K.

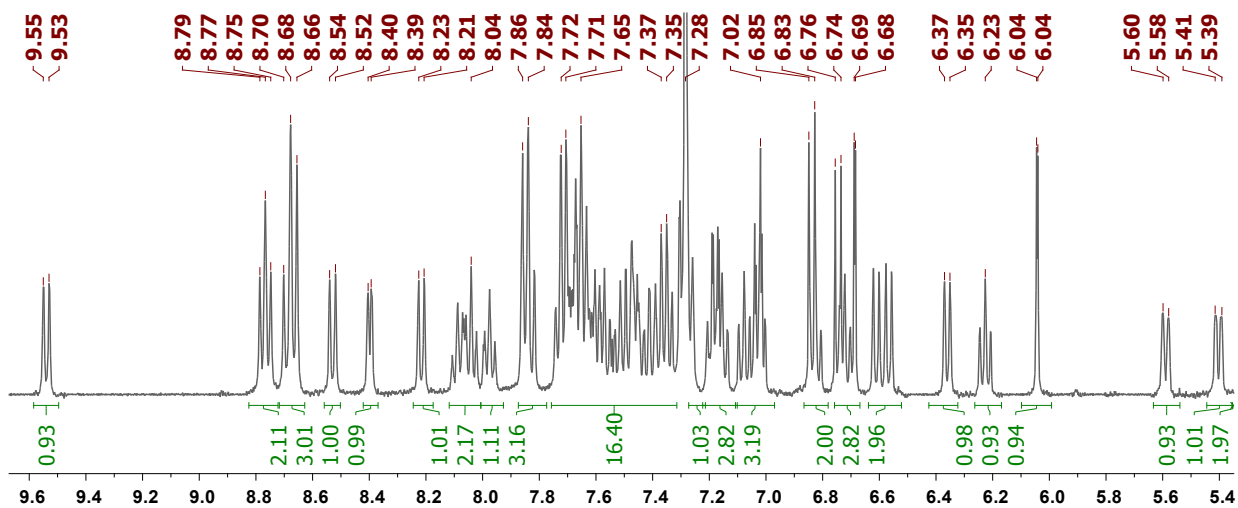

Figure S13.  $^1\text{H}$  NMR spectrum of **5** in  $\text{CDCl}_3$ , 298 K.

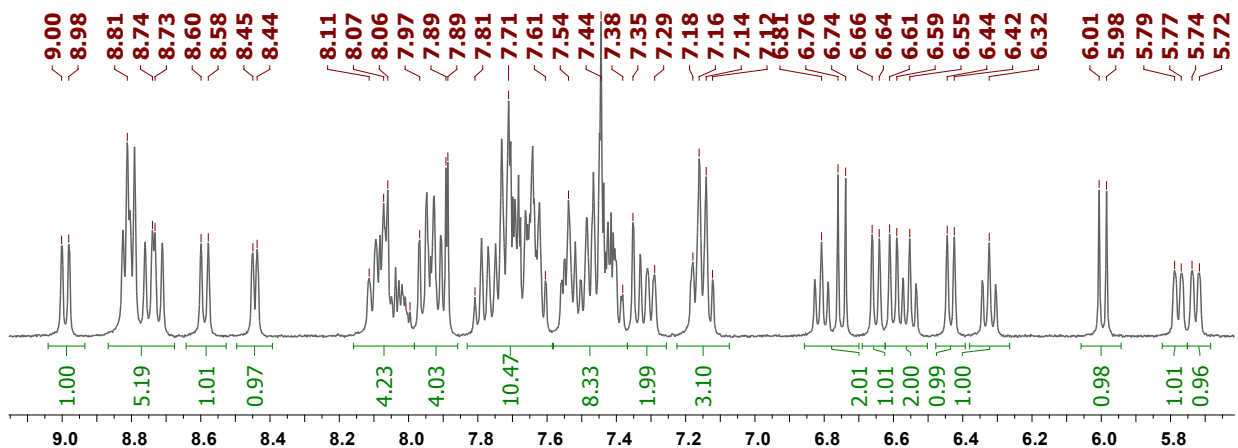

Figure S14.  $^1\text{H}$  NMR spectrum of **6** in  $\text{CD}_2\text{Cl}_2$ , 298 K.

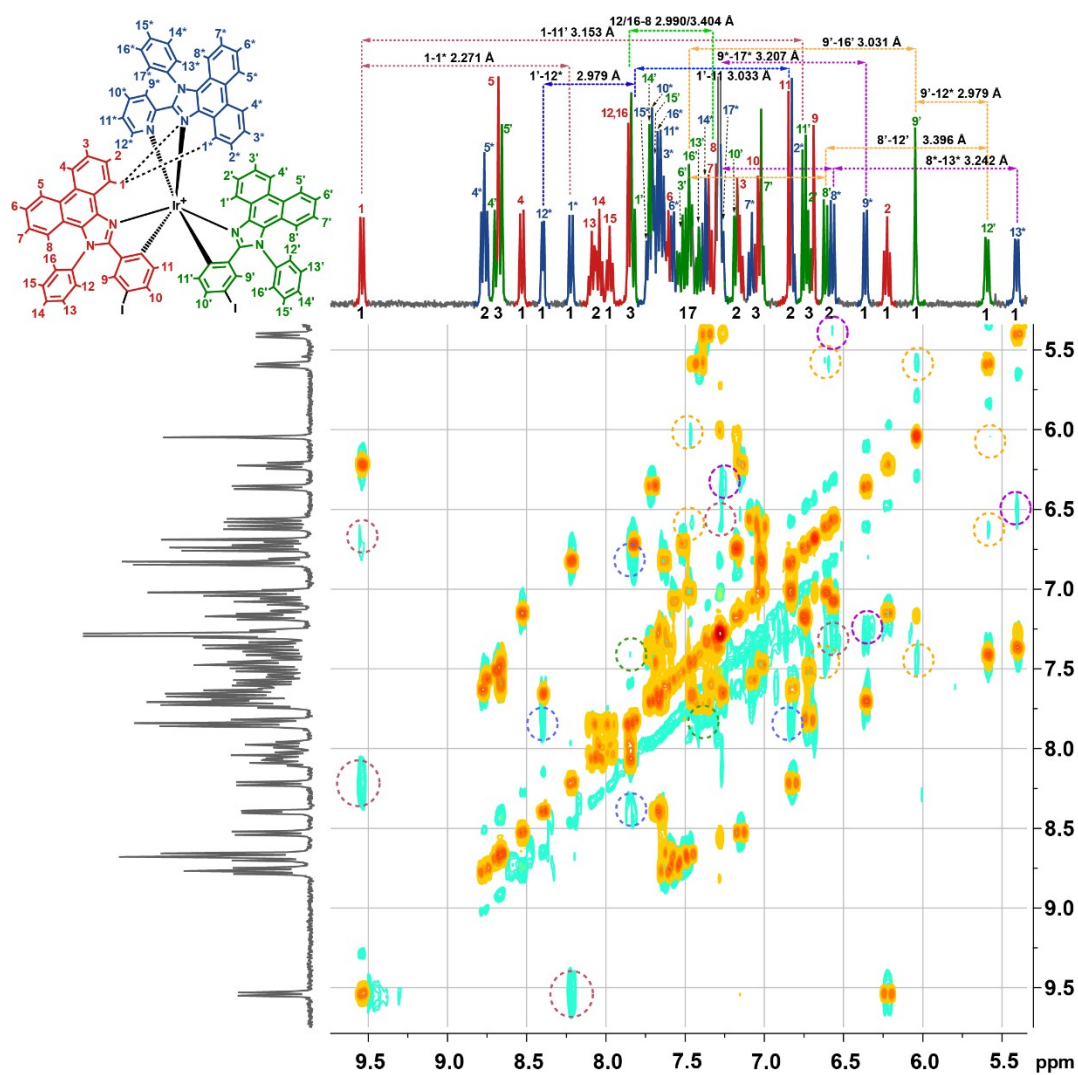

Figure S15. Overlapped  $^1\text{H}$ - $^1\text{H}$  COSY and NOESY NMR spectra of 5 with full assignment of the signals. Top-left structure of the complex shows atom numbering scheme, short contacts between protons revealed in the NOESY spectrum are also accompanied with the distances found in solid state structure.

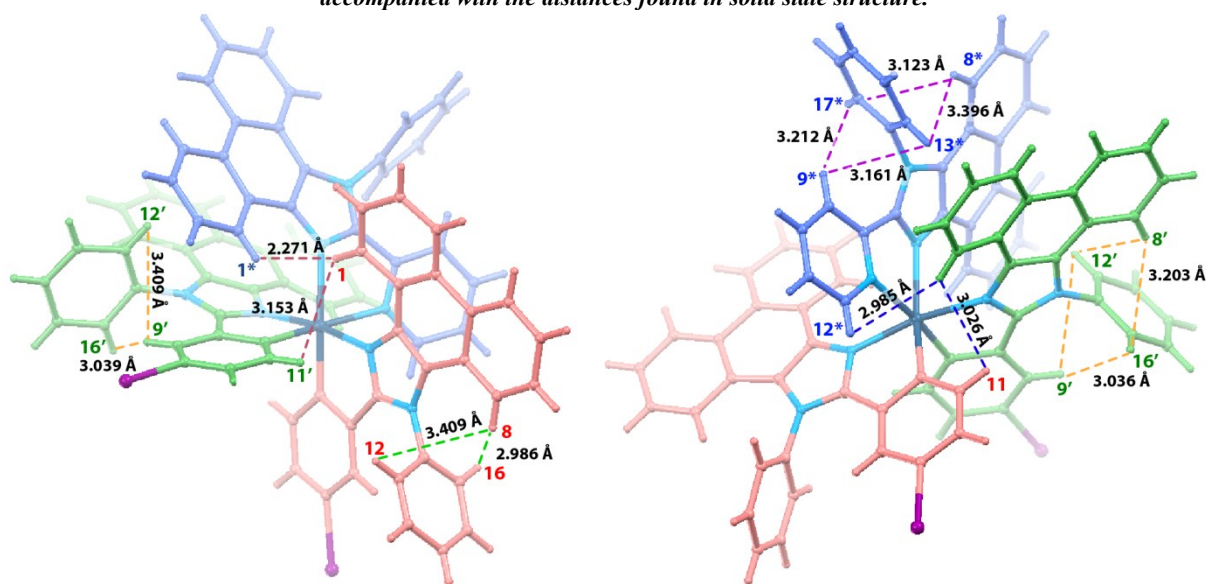

Figure S16. Intramolecular short proton-proton contacts in 5 in the solid state.



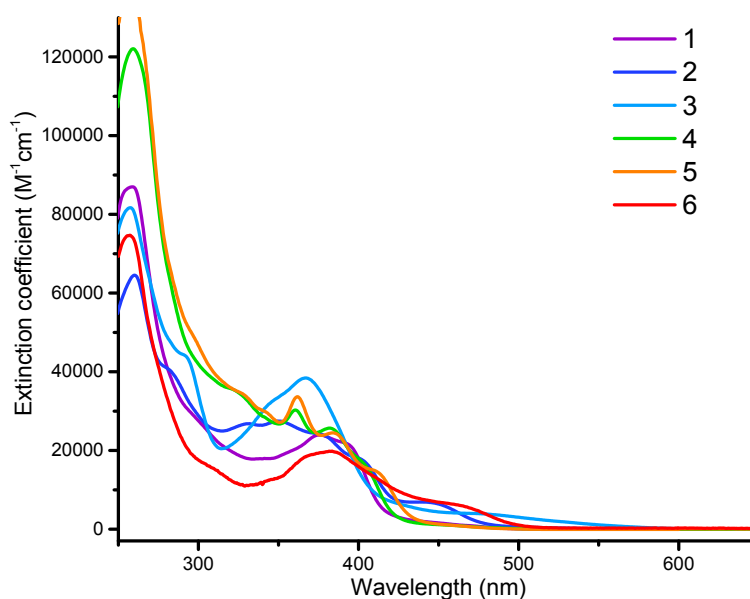

Figure S17. Absorption spectra of 1-6 in  $\text{CH}_2\text{Cl}_2$  ( $1 \times 10^{-5} \text{ M}$ ).

### Computational results for iridium complexes 1-6

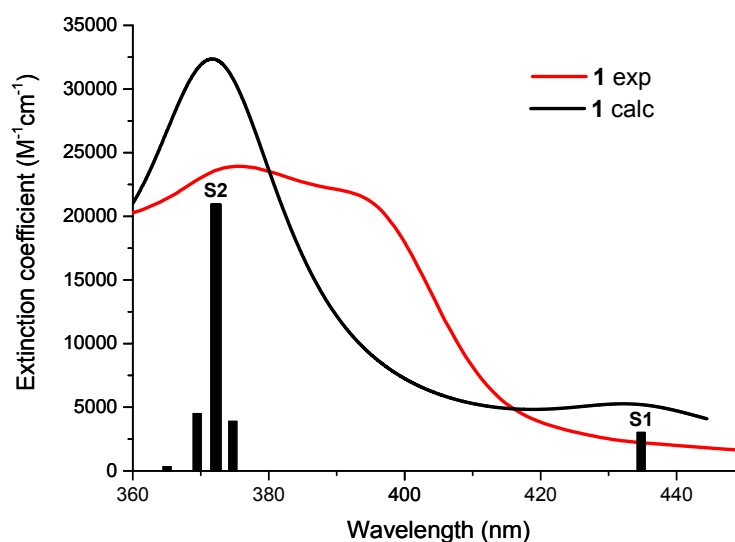

Figure S18. Experimental and calculated absorption spectra of 1. Line halfwidth in the calculated spectrum is  $900 \text{ cm}^{-1}$ .

Table S7. Experimental and calculated data for absorption spectrum of 1. Wavelength ( $\lambda$ ), extinction coefficients ( $\epsilon$ ), oscillator strengths ( $f$ ) and NTO contribution in the corresponding transition.

| $\lambda$ , nm (exp) | $\epsilon \cdot 10^{-3}$ , $\text{M}^{-1} \text{ cm}^{-1}$ (exp) | Transitions                         | $\lambda$ , nm (calc) | $f$ (calc) | Contribution of main NTO in transition, % |
|----------------------|------------------------------------------------------------------|-------------------------------------|-----------------------|------------|-------------------------------------------|
| 445sh                | 1.7                                                              | $\text{S}_0 \rightarrow \text{S}_1$ | 435                   | 0.0373     | 97                                        |
| 375                  | 24                                                               | $\text{S}_0 \rightarrow \text{S}_2$ | 372                   | 0.2555     | 77                                        |

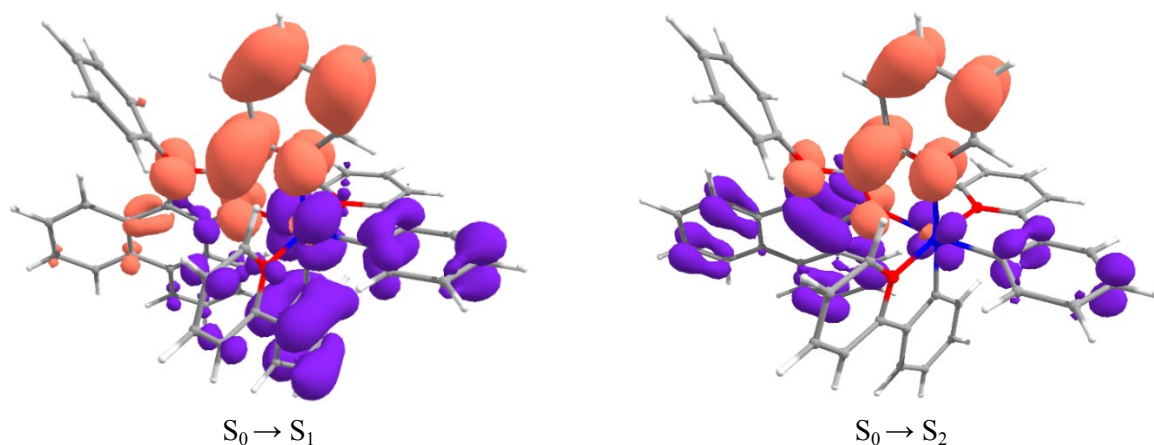

Figure S19. Variations in electronic density upon absorption transitions  $S_0 \rightarrow S_i$  ( $i=1-2$ ) of 1. Violet and terracotta denote decrease and increase of electron density, respectively.

Table S8. IFCT for electronic transitions  $S_0-S_1$  and  $S_0-S_2$ .

| $S_0-S_1$        |          |                 |                  |                  | $S_0-S_2$        |          |                 |                  |                  |
|------------------|----------|-----------------|------------------|------------------|------------------|----------|-----------------|------------------|------------------|
| Donor            | Acceptor |                 |                  |                  | Donor            | Acceptor |                 |                  |                  |
|                  | Ir       | N <sup>^N</sup> | N <sup>^C1</sup> | N <sup>^C2</sup> |                  | Ir       | N <sup>^N</sup> | N <sup>^C1</sup> | N <sup>^C2</sup> |
| Ir               | 0.01     | 0.24            | 0.01             | 0                | Ir               | 0        | 0.06            | 0.01             | 0.02             |
| N <sup>^N</sup>  | 0.01     | 0.17            | 0                | 0                | N <sup>^N</sup>  | 0.02     | 0.57            | 0.02             | 0.02             |
| N <sup>^C1</sup> | 0.01     | 0.33            | 0.01             | 0                | N <sup>^C1</sup> | 0        | 0.04            | 0.01             | 0.02             |
| N <sup>^C2</sup> | 0        | 0.16            | 0                | 0                | N <sup>^C2</sup> | 0        | 0.12            | 0.01             | 0.01             |

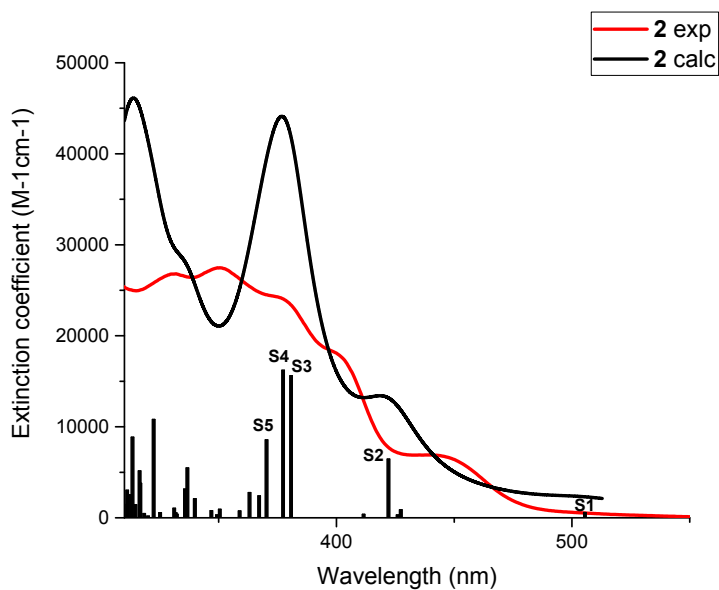

Figure S20. Experimental and calculated absorption spectra of 2. Line halfwidth in the calculated spectrum is  $900 \text{ cm}^{-1}$ .

Table S9. Experimental and calculated data for absorption spectrum of 2. Wavelength ( $\lambda$ ), extinction coefficients ( $\epsilon$ ), oscillator strengths ( $f$ ) and NTO contribution in the corresponding transition.

| $\lambda$ , nm (exp) | $\epsilon \cdot 10^{-3}$ , $\text{M}^{-1} \text{ cm}^{-1}$ (exp) | Transitions           | $\lambda$ , nm (calc) | $f$ (calc) | Contribution of main NTO in transition, % |
|----------------------|------------------------------------------------------------------|-----------------------|-----------------------|------------|-------------------------------------------|
| 500sh (ex)           | -                                                                | $S_0 \rightarrow S_1$ | 505                   | 0.0072     | 99                                        |
| 435sh                | 7                                                                | $S_0 \rightarrow S_2$ | 422                   | 0.079      | 93                                        |
| 370sh                | 24                                                               | $S_0 \rightarrow S_3$ | 381                   | 0.1907     | 51                                        |
|                      |                                                                  | $S_0 \rightarrow S_4$ | 377                   | 0.1981     | 48                                        |

|  |  |                       |     |        |    |
|--|--|-----------------------|-----|--------|----|
|  |  | $S_0 \rightarrow S_5$ | 370 | 0.1047 | 92 |
|--|--|-----------------------|-----|--------|----|

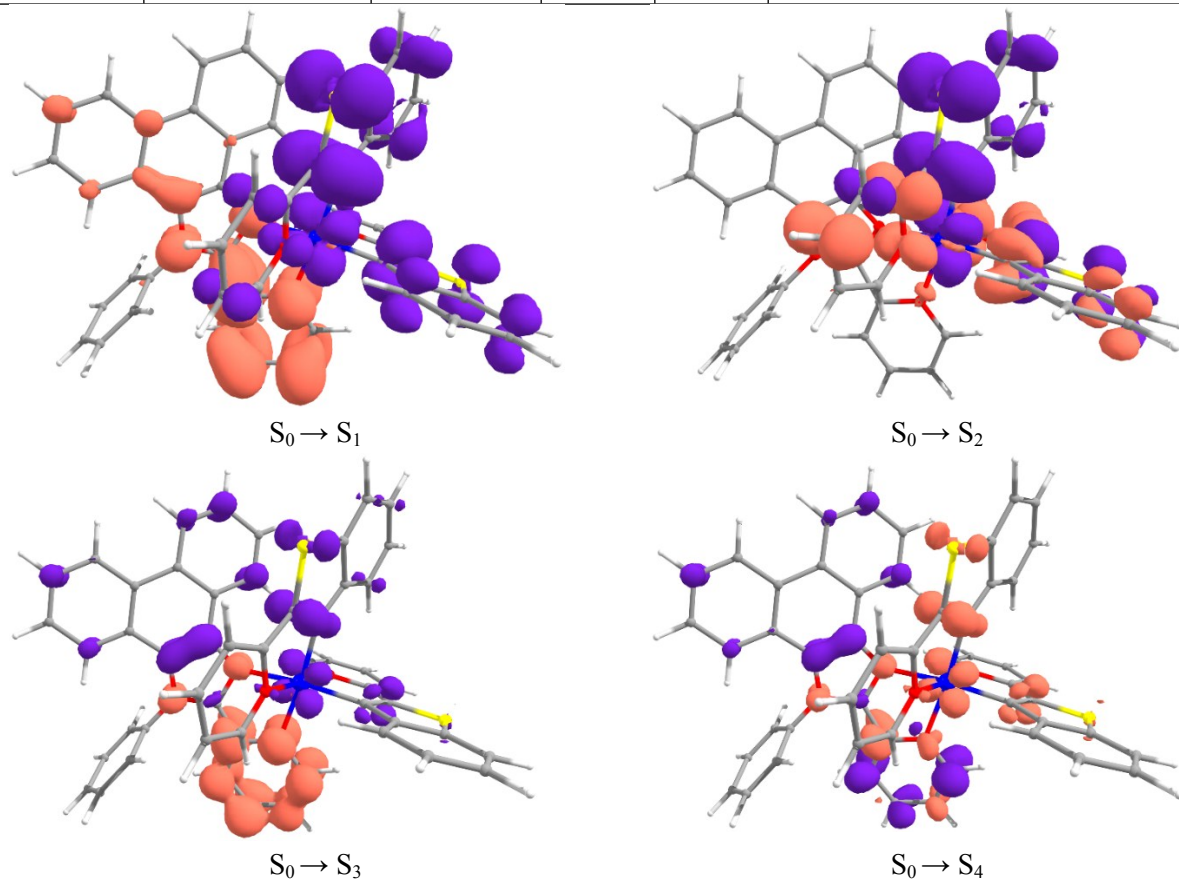

Figure S21. Variations in electronic density upon absorption transitions  $S_0 \rightarrow S_i$  ( $i=1-4$ ) of 2. Violet and terracotta denote decrease and increase of electron density, respectively.

Table S10. Interfragment charge transfer (IFCT) for electronic transitions in 2.

| $S_0-S_1$        |          |                 |                  |                  | $S_0-S_2$        |          |                 |                  |                  |
|------------------|----------|-----------------|------------------|------------------|------------------|----------|-----------------|------------------|------------------|
| Donor            | Acceptor |                 |                  |                  | Donor            | Acceptor |                 |                  |                  |
|                  | Ir       | N <sup>^N</sup> | N <sup>^C1</sup> | N <sup>^C2</sup> |                  | Ir       | N <sup>^N</sup> | N <sup>^C1</sup> | N <sup>^C2</sup> |
| Ir               | 0        | 0.16            | 0                | 0                | Ir               | 0.01     | 0.02            | 0.09             | 0.05             |
| N <sup>^N</sup>  | 0        | 0.04            | 0                | 0                | N <sup>^N</sup>  | 0        | 0.01            | 0.02             | 0.01             |
| N <sup>^1C</sup> | 0.01     | 0.29            | 0                | 0.01             | N <sup>^1C</sup> | 0.01     | 0.05            | 0.16             | 0.09             |
| N <sup>2^C</sup> | 0.01     | 0.44            | 0.01             | 0.01             | N <sup>2^C</sup> | 0.02     | 0.06            | 0.24             | 0.13             |
| $S_0-S_3$        |          |                 |                  |                  | $S_0-S_4$        |          |                 |                  |                  |
| Donor            | Acceptor |                 |                  |                  | Donor            | Acceptor |                 |                  |                  |
|                  | Ir       | N <sup>^N</sup> | N <sup>^C1</sup> | N <sup>^C2</sup> |                  | Ir       | N <sup>^N</sup> | N <sup>^C1</sup> | N <sup>^C2</sup> |
| Ir               | 0        | 0.07            | 0.01             | 0.01             | Ir               | 0        | 0.07            | 0.01             | 0.01             |
| N <sup>^N</sup>  | 0.01     | 0.46            | 0                | 0.01             | N <sup>^N</sup>  | 0.01     | 0.41            | 0.01             | 0.01             |
| N <sup>^C1</sup> | 0        | 0.12            | 0.01             | 0.02             | N <sup>^C1</sup> | 0        | 0.12            | 0.02             | 0.03             |
| N <sup>^C2</sup> | 0        | 0.2             | 0.02             | 0.03             | N <sup>^C2</sup> | 0        | 0.2             | 0.02             | 0.03             |

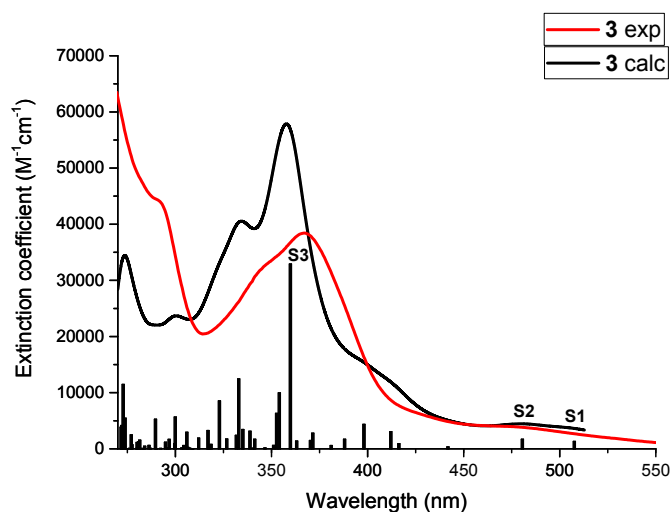

Figure S22. Experimental and calculated absorption spectra of 3. Line halfwidth in the calculated spectrum is  $900\text{ cm}^{-1}$ .

Table S11. Experimental and calculated data for absorption spectrum of 3. Wavelength ( $\lambda$ ), extinction coefficients ( $\epsilon$ ), oscillator strengths ( $f$ ) and NTO contribution in the corresponding transition.

| $\lambda$ , nm (exp) | $\epsilon \cdot 10^{-3}$ , $\text{M}^{-1}\text{ cm}^{-1}$ (exp) | Transitions           | $\lambda$ , nm (calc) | $f$ (calc) | Contribution of main NTO in transition, % |
|----------------------|-----------------------------------------------------------------|-----------------------|-----------------------|------------|-------------------------------------------|
| -                    | -                                                               | $S_0 \rightarrow S_1$ | 507                   | 0.0171     | 98                                        |
| 465sh                | 4.1                                                             | $S_0 \rightarrow S_2$ | 403                   | 0.022      | 98                                        |
| 367                  | 38                                                              | $S_0 \rightarrow S_3$ | 371                   | 0.1358     | 59                                        |

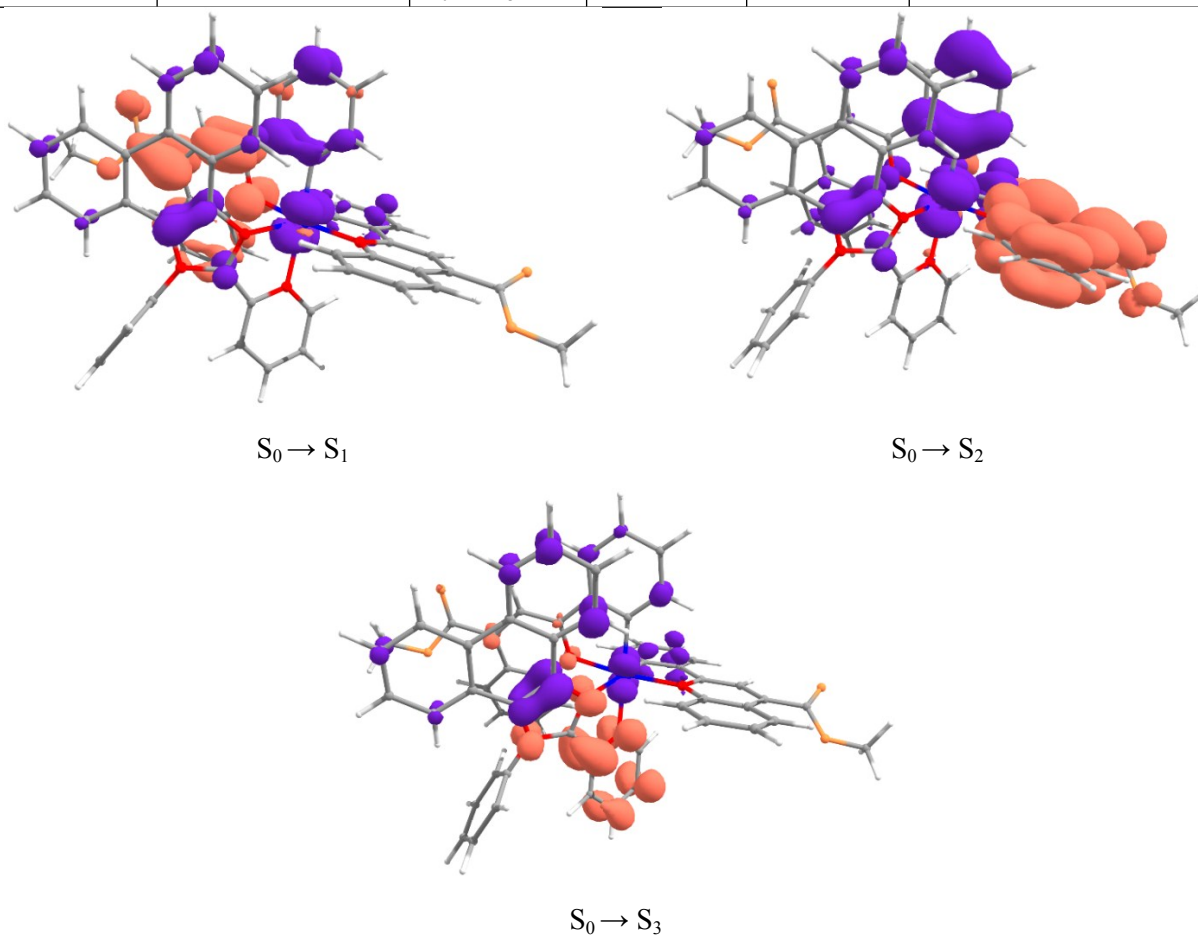

Figure S23. Variations in electronic density upon absorption transitions  $S_0 \rightarrow S_i$  ( $i=1-3$ ) of 3. Violet and terracotta denote decrease and increase of electron density, respectively.

Table S12. Interfragment charge transfer (IFCT) for electronic transitions in 3.

| $S_0-S_1$        |          |                 |                  |                  | $S_0-S_2$        |          |                 |                  |                  | $S_0-S_3$        |          |                 |                  |                  |
|------------------|----------|-----------------|------------------|------------------|------------------|----------|-----------------|------------------|------------------|------------------|----------|-----------------|------------------|------------------|
| Donor            | Acceptor |                 |                  |                  | Donor            | Acceptor |                 |                  |                  | Donor            | Acceptor |                 |                  |                  |
|                  | Ir       | N <sup>^N</sup> | N <sup>^C1</sup> | N <sup>^C2</sup> |                  | Ir       | N <sup>^N</sup> | N <sup>^C1</sup> | N <sup>^C2</sup> |                  | Ir       | N <sup>^N</sup> | N <sup>^C1</sup> | N <sup>^C2</sup> |
| Ir               | 0.01     | 0               | 0                | 0.20             | Ir               | 0        | 0.06            | 0.04             | 0.01             | Ir               | 0.02     | 0.03            | 0.02             | 0.02             |
| N <sup>^N</sup>  | 0.01     | 0.01            | 0                | 0.31             | N <sup>^N</sup>  | 0.01     | 0.35            | 0.03             | 0.01             | N <sup>^N</sup>  | 0.05     | 0.11            | 0.06             | 0.06             |
| N <sup>^C1</sup> | 0.01     | 0               | 0                | 0.28             | N <sup>^C1</sup> | 0.01     | 0.04            | 0.1              | 0.03             | N <sup>^C1</sup> | 0.05     | 0.13            | 0.07             | 0.07             |
| N <sup>^C2</sup> | 0.01     | 0               | 0                | 0.14             | N <sup>^C2</sup> | 0.01     | 0.12            | 0.09             | 0.03             | N <sup>^C2</sup> | 0.06     | 0.13            | 0.07             | 0.07             |

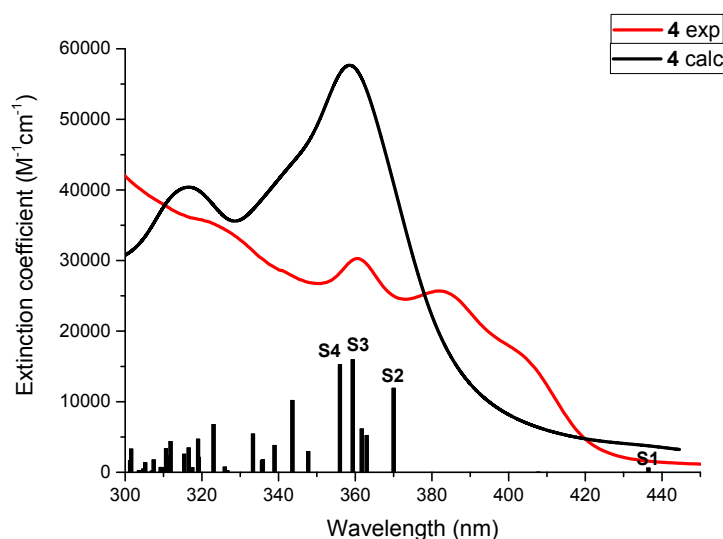

Figure S24. Experimental and calculated absorption spectra of 4. Line halfwidth in the calculated spectrum is  $900\text{ cm}^{-1}$ .

Table S13. Experimental and calculated data for absorption spectrum of 4. Wavelength ( $\lambda$ ), extinction coefficients ( $\epsilon$ ), oscillator strengths ( $f$ ) and NTO contribution in the corresponding transition.

| $\lambda$ , nm (exp) | $\epsilon \cdot 10^{-3}$ , $M^{-1}\text{ cm}^{-1}$ (exp) | Transitions           | $\lambda$ , nm (calc) | $f$ (calc) | Contribution of main NTO in transition, % |
|----------------------|----------------------------------------------------------|-----------------------|-----------------------|------------|-------------------------------------------|
| 400sh                |                                                          | $S_0 \rightarrow S_1$ | 436                   | 0.0078     | 98                                        |
| 373sh                | 29                                                       | $S_0 \rightarrow S_2$ | 370                   | 0.1459     | 80                                        |
| 361                  | 36                                                       | $S_0 \rightarrow S_3$ | 359                   | 0.1954     | 89                                        |
|                      |                                                          | $S_0 \rightarrow S_4$ | 356                   | 0.1867     | 89                                        |

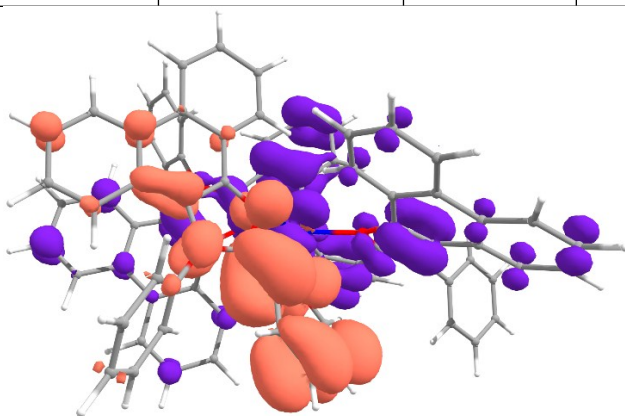

$S_0 \rightarrow S_1$

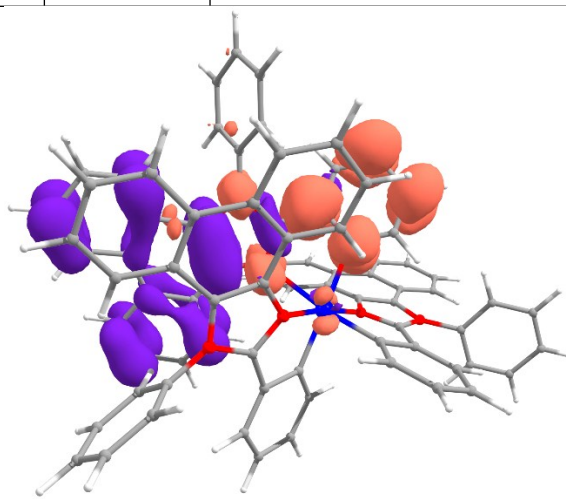

$S_0 \rightarrow S_2$

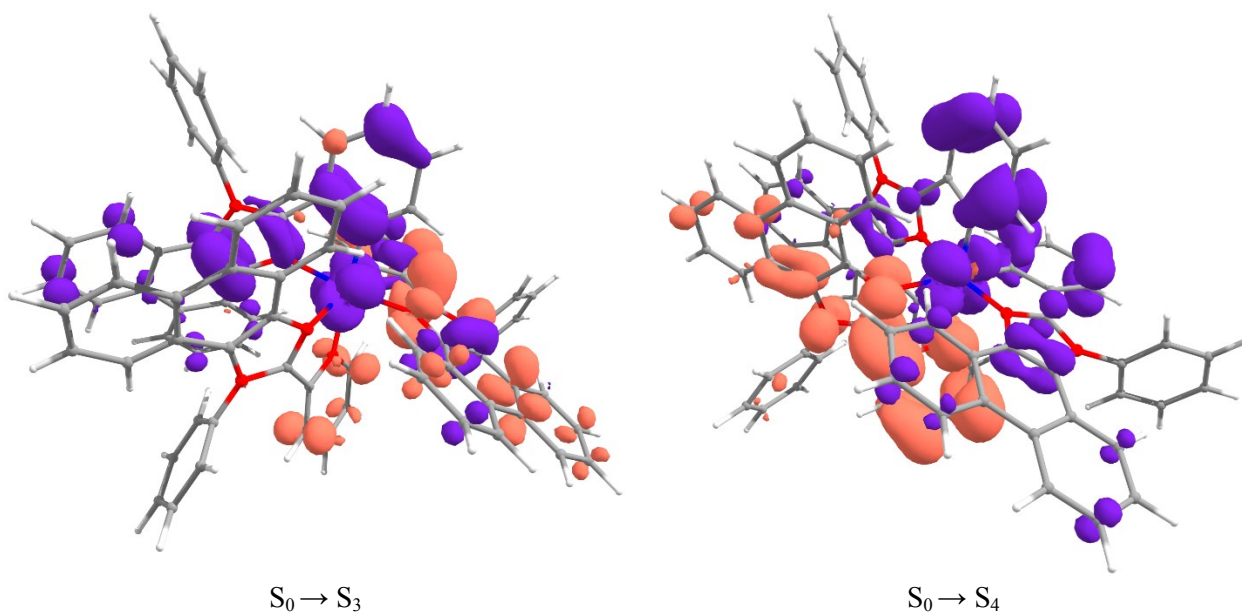

Figure S25. Variations in electronic density upon absorption transitions  $S_0 \rightarrow S_i$  ( $i=1-4$ ) of 4. Violet and terracotta denote decrease and increase of electron density, respectively.

Table S14. Interfragment charge transfer (IFCT) for electronic transitions in 4.

| $S_0-S_1$        |          |                 |                  |                  | $S_0-S_2$        |          |                 |                  |                  |
|------------------|----------|-----------------|------------------|------------------|------------------|----------|-----------------|------------------|------------------|
| Donor            | Acceptor |                 |                  |                  | Donor            | Acceptor |                 |                  |                  |
|                  | Ir       | N <sup>^N</sup> | N <sup>^C1</sup> | N <sup>^C2</sup> |                  | Ir       | N <sup>^N</sup> | N <sup>^C1</sup> | N <sup>^C2</sup> |
| Ir               | 0        | 0.15            | 0                | 0                | Ir               | 0        | 0.06            | 0.01             | 0.01             |
| N <sup>^N</sup>  | 0        | 0.03            | 0                | 0                | N-N              | 0.01     | 0.5             | 0.01             | 0.01             |
| N <sup>^1C</sup> | 0.01     | 0.31            | 0.01             | 0.01             | N <sup>^1C</sup> | 0        | 0.11            | 0.02             | 0.02             |
| N <sup>2^C</sup> | 0.01     | 0.43            | 0.01             | 0.01             | N <sup>2^C</sup> | 0        | 0.14            | 0.02             | 0.03             |
| $S_0-S_3$        |          |                 |                  |                  | $S_0-S_4$        |          |                 |                  |                  |
| Donor            | Acceptor |                 |                  |                  | Donor            | Acceptor |                 |                  |                  |
|                  | Ir       | N <sup>^N</sup> | N <sup>^C1</sup> | N <sup>^C2</sup> |                  | Ir       | N <sup>^N</sup> | N <sup>^C1</sup> | N <sup>^C2</sup> |
| Ir               | 0        | 0.03            | 0.06             | 0.06             | Ir               | 0        | 0.14            | 0.01             | 0.01             |
| N <sup>^N</sup>  | 0        | 0.02            | 0.01             | 0.01             | N <sup>^N</sup>  | 0.01     | 0.26            | 0.01             | 0.01             |
| N <sup>^C1</sup> | 0.01     | 0.05            | 0.13             | 0.13             | N <sup>^C1</sup> | 0.01     | 0.21            | 0.01             | 0.01             |
| N <sup>^C2</sup> | 0.01     | 0.07            | 0.18             | 0.18             | N <sup>^C2</sup> | 0.01     | 0.22            | 0.02             | 0.02             |



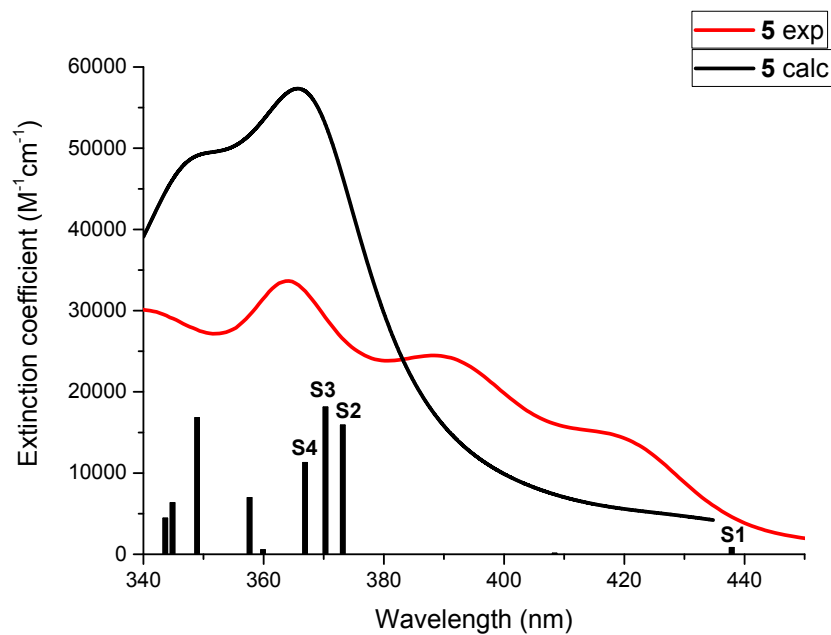

Figure S26. Experimental and calculated absorption spectra of 5. Line halfwidth in the calculated spectrum is  $900\text{ cm}^{-1}$ .

Table S15. Experimental and calculated data for absorption spectrum of 5. Wavelength ( $\lambda$ ), extinction coefficients ( $\epsilon$ ), oscillator strengths ( $f$ ) and NTO contribution in the corresponding transition.

| $\lambda$ , nm (exp) | $\epsilon \cdot 10^{-3}$ , $\text{M}^{-1}\text{ cm}^{-1}$ (exp) | Transitions           | $\lambda$ , nm (calc) | $f$ (calc) | Contribution of main NTO in transition, % |
|----------------------|-----------------------------------------------------------------|-----------------------|-----------------------|------------|-------------------------------------------|
| 410sh                |                                                                 | $S_0 \rightarrow S_1$ | 429                   | 0.0107     | 98                                        |
| 379sh                | 23                                                              | $S_0 \rightarrow S_2$ | 370                   | 0.1947     | 52                                        |
| 362                  | 31                                                              | $S_0 \rightarrow S_3$ | 368                   | 0.2218     | 70                                        |
|                      |                                                                 | $S_0 \rightarrow S_4$ | 364                   | 0.1383     | 67                                        |

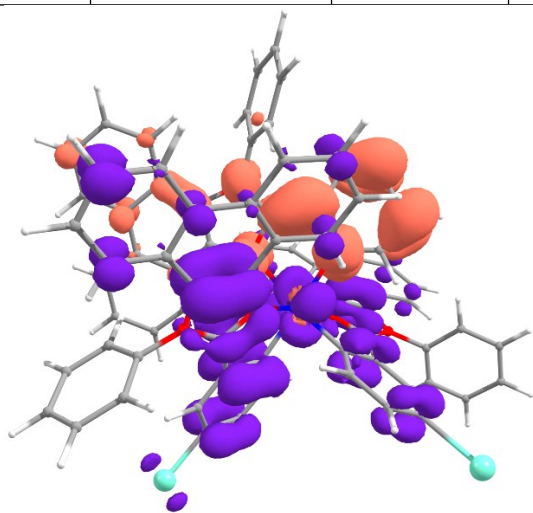

$S_0 \rightarrow S_1$

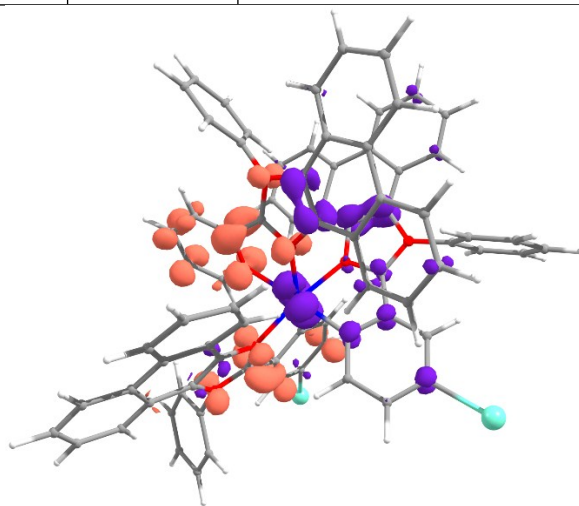

$S_0 \rightarrow S_2$

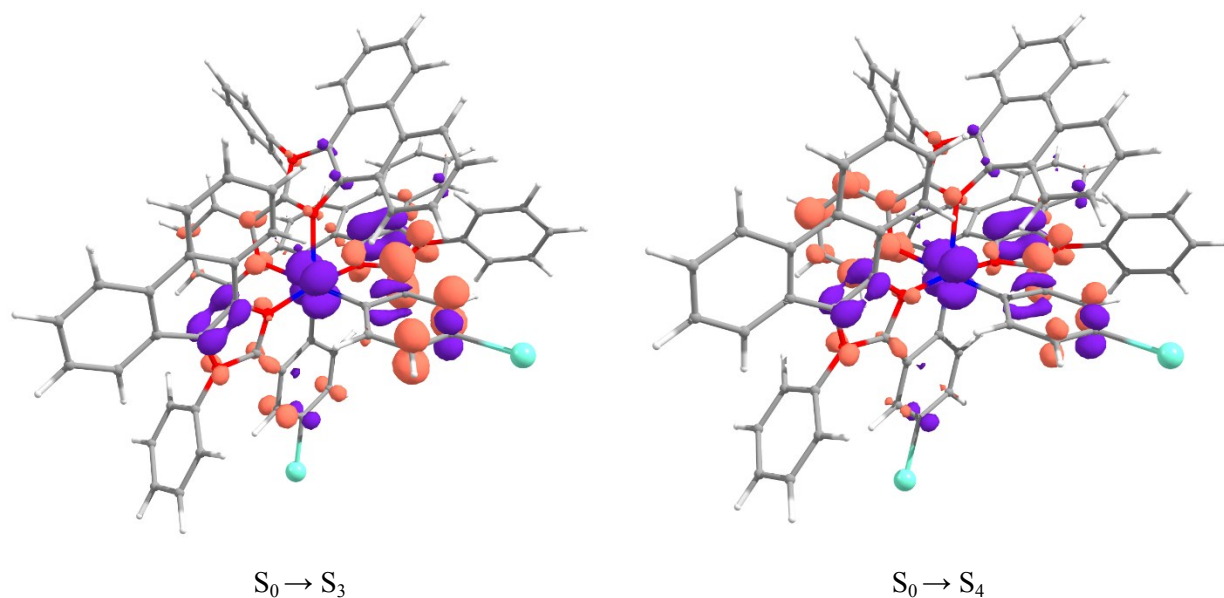

Figure S27. Variations in electronic density upon absorption transitions  $S_0 \rightarrow S_i$  ( $i=1-4$ ) of 5. Violet and terracotta denote decrease and increase of electron density, respectively.

Table S16. Interfragment charge transfer (IFCT) for electronic transitions in 5.

| $S_0-S_1$        |          |                 |                  |                  | $S_0-S_2$        |          |                 |                  |                  |
|------------------|----------|-----------------|------------------|------------------|------------------|----------|-----------------|------------------|------------------|
| Donor            | Acceptor |                 |                  |                  | Donor            | Acceptor |                 |                  |                  |
|                  | Ir       | N <sup>^N</sup> | N <sup>^C1</sup> | N <sup>^C2</sup> |                  | Ir       | N <sup>^N</sup> | N <sup>^C1</sup> | N <sup>^C2</sup> |
| Ir               | 0        | 0.13            | 0                | 0.01             | Ir               | 0        | 0.02            | 0.05             | 0.01             |
| N <sup>^N</sup>  | 0        | 0.04            | 0                | 0                | N <sup>^N</sup>  | 0.01     | 0.3             | 0.02             | 0.02             |
| N <sup>^C1</sup> | 0.01     | 0.32            | 0.01             | 0.02             | N <sup>^C1</sup> | 0        | 0.05            | 0.13             | 0.04             |
| N <sup>^C2</sup> | 0.01     | 0.39            | 0.01             | 0.03             | N <sup>^C2</sup> | 0.01     | 0.08            | 0.16             | 0.04             |
| $S_0-S_3$        |          |                 |                  |                  | $S_0-S_4$        |          |                 |                  |                  |
| Donor            | Acceptor |                 |                  |                  | Donor            | Acceptor |                 |                  |                  |
|                  | Ir       | N <sup>^N</sup> | N <sup>^C1</sup> | N <sup>^C2</sup> |                  | Ir       | N <sup>^N</sup> | N <sup>^C1</sup> | N <sup>^C2</sup> |
| Ir               | 0        | 0.02            | 0.04             | 0.05             | Ir               | 0        | 0.02            | 0.04             | 0.05             |
| N <sup>^N</sup>  | 0.01     | 0.19            | 0.02             | 0.03             | N <sup>^N</sup>  | 0.01     | 0.2             | 0.02             | 0.03             |
| N <sup>^C1</sup> | 0        | 0.05            | 0.1              | 0.12             | N <sup>^C1</sup> | 0        | 0.06            | 0.09             | 0.11             |
| N <sup>^C2</sup> | 0.01     | 0.07            | 0.12             | 0.15             | N <sup>^C2</sup> | 0.01     | 0.08            | 0.11             | 0.14             |

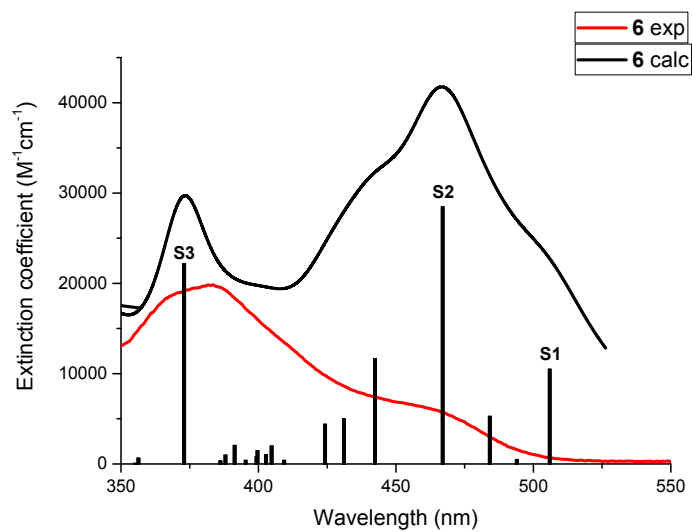

Figure S28. Experimental and calculated absorption spectra of 6. Line halfwidth in the calculated spectrum is  $900\text{ cm}^{-1}$ .

**Table S17.** Experimental and calculated data for absorption spectrum of **6**. Wavelength ( $\lambda$ ), extinction coefficients ( $\epsilon$ ), oscillator strengths ( $f$ ) and NTO contribution in the corresponding transition.

| $\lambda$ , nm (exp) | $\epsilon \cdot 10^{-3}$ , M <sup>-1</sup> cm <sup>-1</sup> (exp) | Transitions                     | $\lambda$ , nm (calc) | $f$ (calc) | Contribution of main NTO in transition, % |
|----------------------|-------------------------------------------------------------------|---------------------------------|-----------------------|------------|-------------------------------------------|
| -                    | -                                                                 | S <sub>0</sub> → S <sub>1</sub> | 506                   | 0.1286     | 94                                        |
| 450sh                | -                                                                 | S <sub>0</sub> → S <sub>2</sub> | 467                   | 0.348      | 94                                        |
| 377                  | -                                                                 | S <sub>0</sub> → S <sub>3</sub> | 373                   | 0.2713     | 94                                        |

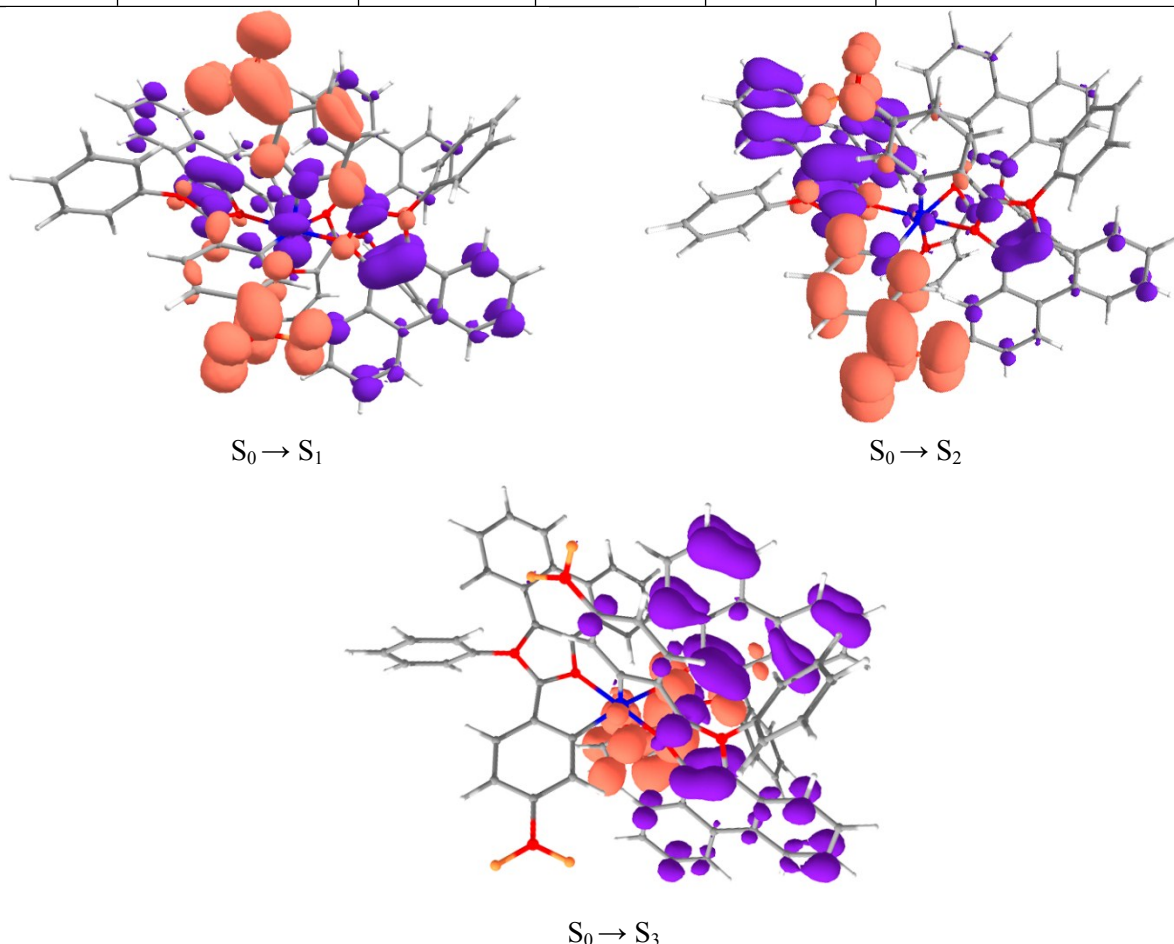

**Figure S29.** Variations in electronic density upon absorption transitions S<sub>0</sub> → S<sub>i</sub> (i=1-3) of **6**. Violet and terracotta denote decrease and increase of electron density, respectively.

**Table S18.** Interfragment charge transfer (IFCT) for electronic transitions in **6**.

| S <sub>0</sub> -S <sub>1</sub> |          |                  |                   |                   | S <sub>0</sub> -S <sub>2</sub> |   |      |      |      | S <sub>0</sub> -S <sub>3</sub> |      |      |      |      |  |
|--------------------------------|----------|------------------|-------------------|-------------------|--------------------------------|---|------|------|------|--------------------------------|------|------|------|------|--|
| Donor                          | Acceptor |                  |                   |                   |                                |   |      |      |      |                                |      |      |      |      |  |
|                                | Ir       | N <sup>^</sup> N | N <sup>^</sup> C1 | N <sup>^</sup> C2 |                                |   |      |      |      |                                |      |      |      |      |  |
| Ir                             | 0        | 0                | 0.03              | 0.05              | Ir                             | 0 | 0    | 0.01 | 0.01 | Ir                             | 0    | 0    | 0    | 0    |  |
| N <sup>^</sup> N               | 0        | 0                | 0.06              | 0.1               | N <sup>^</sup> N               | 0 | 0    | 0.07 | 0.05 | N <sup>^</sup> N               | 0.02 | 0.59 | 0.01 | 0.02 |  |
| N <sup>^</sup> C1              | 0        | 0                | 0.12              | 0.18              | N <sup>^</sup> C1              | 0 | 0.01 | 0.36 | 0.22 | N <sup>^</sup> C1              | 0    | 0    | 0    | 0    |  |
| N <sup>^</sup> C2              | 0        | 0                | 0.15              | 0.26              | N <sup>^</sup> C2              | 0 | 0    | 0.14 | 0.09 | N <sup>^</sup> C2              | 0.01 | 0.28 | 0.01 | 0.01 |  |

**Table S19.** Experimental and calculated (T<sub>1</sub> → S<sub>0</sub>) emission wavelength in dichloroethane. Vibrational structure of the ground state have been taken into account upon calculations.

| Compound | $\lambda_{em}(exp)$ , nm | $\lambda_{em}(calc)$ , nm |
|----------|--------------------------|---------------------------|
| <b>1</b> | 540                      | 502                       |
| <b>2</b> | 597                      | 557                       |

|   |     |     |
|---|-----|-----|
| 3 | 645 | 610 |
| 4 | 553 | 510 |
| 5 | 545 | 559 |
| 6 | 645 | 619 |

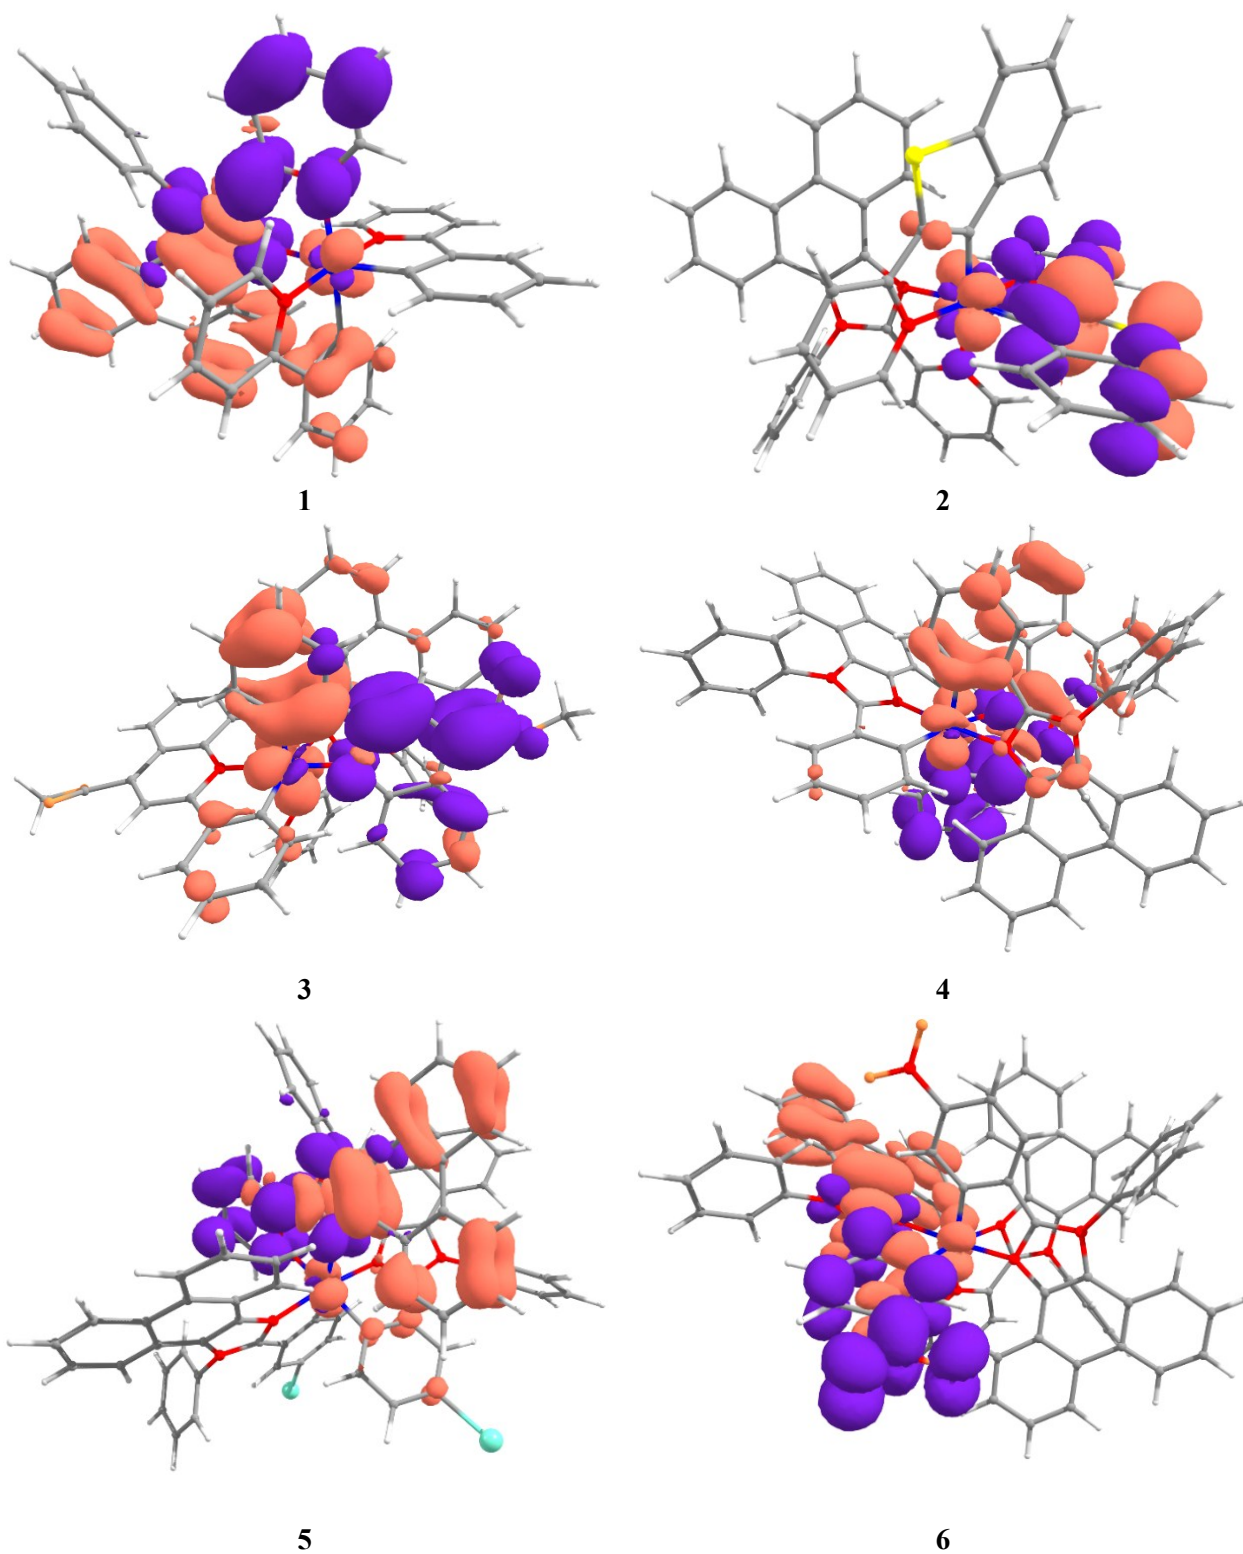

Figure S30. Variations in electronic density upon emissive transitions  $T_1 \rightarrow S_0$  for 1-6. Violet and terracotta denote decrease and increase of electron density, respectively.

**Table S20. Interfragment charge transfer (IFCT) in 1-6 upon  $T_1$ - $S_0$  transition (in parts of electronic charge).**

| 1                 |             |                  |                   |                   | 2                                            |             |                  |                   |                   |                                              |
|-------------------|-------------|------------------|-------------------|-------------------|----------------------------------------------|-------------|------------------|-------------------|-------------------|----------------------------------------------|
| Donor             | Acceptor    |                  |                   |                   | Donor                                        | Acceptor    |                  |                   |                   |                                              |
|                   | Ir          | N <sup>^</sup> N | N <sup>^</sup> C1 | N <sup>^</sup> C2 |                                              | Ir          | N <sup>^</sup> N | N <sup>^</sup> C1 | N <sup>^</sup> C2 |                                              |
| Ir                | 0.01        | 0.01             | 0.01              | 0                 | Ir                                           | 0.01        | 0                | 0.03              | 0.01              |                                              |
| N <sup>^</sup> N  | <b>0.16</b> | <b>0.37</b>      | <b>0.23</b>       | <b>0.12</b>       | N <sup>^</sup> N                             | 0.01        | 0                | 0.05              | 0.02              |                                              |
| N <sup>^</sup> C1 | 0           | 0.01             | 0                 | 0                 | N <sup>^</sup> C1                            | <b>0.11</b> | 0.03             | <b>0.45</b>       | <b>0.22</b>       |                                              |
| N <sup>^</sup> C2 | 0           | 0                | 0                 | 0                 | N <sup>^</sup> C2                            | 0           | 0                | 0.01              | 0.01              |                                              |
| 3                 |             |                  |                   |                   | 4                                            |             |                  |                   |                   |                                              |
| Donor             | Acceptor    |                  |                   |                   | Donor                                        | Acceptor    |                  |                   |                   |                                              |
|                   | Ir          | N <sup>^</sup> N | N <sup>^</sup> C1 | N <sup>^</sup> C2 |                                              | Ir          | N <sup>^</sup> N | N <sup>^</sup> C1 | N <sup>^</sup> C2 |                                              |
| Ir                | 0.01        | 0                | 0.02              | 0.01              | Ir                                           | 0           | 0.01             | 0                 | 0.01              |                                              |
| N <sup>^</sup> N  | 0.01        | 0.01             | 0.02              | 0.01              | N <sup>^</sup> N                             | 0.08        | <b>0.29</b>      | <b>0.14</b>       | <b>0.36</b>       |                                              |
| N <sup>^</sup> C1 | <b>0.17</b> | <b>0.23</b>      | <b>0.34</b>       | <b>0.13</b>       | N <sup>^</sup> C1                            | 0           | 0.01             | 0                 | 0.01              |                                              |
| N <sup>^</sup> C2 | 0           | 0                | 0                 | 0                 | N <sup>^</sup> C2                            | 0           | 0.01             | 0                 | 0.01              |                                              |
| 5                 |             |                  |                   |                   | 6                                            |             |                  |                   |                   |                                              |
| Donor             | Acceptor    |                  |                   |                   | Donor                                        | Acceptor    |                  |                   |                   |                                              |
|                   | Ir          | N <sup>^</sup> N | N <sup>^</sup> C1 | N <sup>^</sup> C2 |                                              | Ir          | N <sup>^</sup> N | N <sup>^</sup> C1 | N <sup>^</sup> C2 | Ph-NO <sub>2</sub><br>(in N <sup>^</sup> C1) |
| Ir                | 0           | 0.01             | 0                 | 0                 | Ir                                           | 0           | 0                | 0.01              | 0                 | 0                                            |
| N <sup>^</sup> N  | 0.05        | <b>0.46</b>      | <b>0.1</b>        | <b>0.28</b>       | N <sup>^</sup> N                             | 0           | 0                | 0                 | 0                 | 0                                            |
| N <sup>^</sup> C1 | 0           | 0.01             | 0                 | 0                 | N <sup>^</sup> C1                            | 0.01        | 0.01             | 0.1               | 0.02              | 0.03                                         |
| N <sup>^</sup> C2 | 0           | 0.01             | 0                 | 0                 | N <sup>^</sup> C2                            | 0           | 0                | 0.01              | 0                 | 0                                            |
|                   |             |                  |                   |                   | Ph-NO <sub>2</sub><br>(in N <sup>^</sup> C1) | 0.06        | 0.04             | <b>0.41</b>       | 0.1               | <b>0.14</b>                                  |

**Table S21. Comparison of absorption and emission wavelengths of N<sup>^</sup>C6 and N<sup>^</sup>C6H<sup>+</sup> calculated by various hybrid GGA functionals and experimental ones (DCE solvent).**

|                   | N <sup>^</sup> C6, $\lambda_{\text{abs}}$ (S1), nm | N <sup>^</sup> C6H <sup>+</sup> , $\lambda_{\text{abs}}$ (S1), nm | N <sup>^</sup> C6, $\lambda_{\text{em}}$ , nm | N <sup>^</sup> C6 H <sup>+</sup> , $\lambda_{\text{em}}$ , nm |
|-------------------|----------------------------------------------------|-------------------------------------------------------------------|-----------------------------------------------|---------------------------------------------------------------|
| <b>Experiment</b> | <b>395</b>                                         | <b>355</b>                                                        | <b>620</b>                                    | <b>595</b>                                                    |
| APFD              | 472                                                | 415                                                               | 601                                           | 519                                                           |
| B3LYP             | 510                                                | –                                                                 | –                                             | –                                                             |
| CAM-B3LYP         | 348                                                | –                                                                 | 479                                           | –                                                             |
| HSEH1PBE          | 494                                                | –                                                                 | –                                             | –                                                             |
| LC-wHPBE          | 302                                                | –                                                                 | –                                             | –                                                             |
| M06               | 462                                                | –                                                                 | –                                             | –                                                             |
| M06HF             | 323                                                | –                                                                 | –                                             | –                                                             |
| M08HX             | 351                                                | –                                                                 | –                                             | –                                                             |
| M11               | 316                                                | –                                                                 | –                                             | –                                                             |
| M062X             | 347                                                | 315                                                               | 469                                           | 438                                                           |
| MN12SX            | 488                                                | 430                                                               | 729                                           | 538                                                           |
| <b>MN15</b>       | <b>390</b>                                         | <b>351</b>                                                        | <b>504</b>                                    | <b>474</b>                                                    |
| N12SX             | 509                                                | –                                                                 | –                                             | –                                                             |
| PBE0              | 456                                                | 401                                                               | 561                                           | 507                                                           |

|          |     |   |     |   |
|----------|-----|---|-----|---|
| PW6B95D3 | 448 | - | -   | - |
| SOGGA11X | 387 | - | 495 | - |
| TPSSh    | 559 | - | -   | - |
